# Supplementary material for: Island-sensitivity of two different interpretations of why in Chinese
Source: Frontiers journal article supplement (doi:10.3389/fpsyg.2022.1059823), 2023-01-20
Supplement: Table_1.DOCX [file Table_1.DOCX]

Supplementary Material

# The whole stimuli for the experiment

Condition A: non-RC*short-distance**weishenmeR*

Condition B: non-RC*short-distance**weishenmeP*

Condition C: non-RC*long-distance**weishenmeR*

Condition D: non-RC*long-distance**weishenmeP*

Condition E: RC*short-distance**weishenmeR*

Condition F: RC*short-distance**weishenmeP*

Condition G: RC*long-distance**weishenmeR*

Condition H: RC*long-distance**weishenmeP*

Condition I: non-RC*short-distance* *weileshenmeP*

Condition J: non-RC*long-distance**weileshenmeP*

Condition K: RC*short-distance* *weileshenmeP*

Condition L: RC*long-distance**weileshenmeP*

| Condition A | 王强：安娜 为什么 说 李明 逃课 了?  Anna weishenme shuo Liming taoke le  Anna why say Liming skip.class PERF  ‘Why did Anna *t* say that Liming skipped the class?’  李雷：因为 李明 今天 没 来 上课。  yinwei Liming jintian mei lai shangke  because Liming today not come have.class  ‘Because Liming did not come to class today.’ |
| --- | --- |
| 俊朗：俊杰 为什么 说 李洋 辞职 了?  Junjie weishenme shuo Liyang cizhi le  Junjie why say Liyang resign PERF  ‘Why did Junjie *t* say that Liyang had resigned?’  田磊：因为 他 昨天 看到 李洋 提交 申请书 了。  yinwei ta zuotian kandao Liyang tijiao shenqingshu le  because he yesterday see Liyang submit application PERF  ‘Because he saw Liyang submit the application form yesterday.’ |
| 苏西：刘颖 为什么 说 陈安 说谎 了?  Liuying weishenme shuo Chenan shuohuang le  Liuying why say Chenan tell.a.lie  ‘Why did Liuying *t* say that Chenan had told a lie?’  苏珊：因为 她 发现 陈安 说话 时 眼神 闪躲。  yinwei ta faxian Chenan shuohua shi yanshen shanduo  because she find Chenan talk when eye dodge  ‘Because she found that Chenan’s eyes were dodging when she talked.’ |
| 吉恩：志安 为什么 说 成杰 去 医院 了?  Zhian weishenme shuo Chengjie qu yiyuan le  Zhian why say Chengjie go hospital  ‘Why did Zhian *t* say that Chengjie went to the hospital?’  塞恩：因为 他 看见 成杰 从 医院 里 出来 了。  yinwei ta kanjian Chengjie cong yiyuan li chulai le  because he see Chengjie from hospital in out PERF  ‘Because he saw Chengjie come out from the hospital.’ |
| 林恩：小赵 为什么 说 美美 参加 了 比赛?  Xiaozhao weishenme shuo Meimei canjia le bisai  Xiaozhao why say Meimei participate PERF competition  ‘Why did Xiaozhao *t* say that Meimei participated in the competition?’  麦基：因为 他 看见 她的 报名表 了。  yinwei ta kanjian tade baomingbiao le  because he see her application PERF  ‘Because he saw her application form.’ |
| 波特：孙艺 为什么 举报 杰豪 不 写 作业?  Sunyi weishenme jubao Jiehao bu xie zuoye  Sunyi why report Jiehao not write homework  ‘Why did Sunyi *t* report that Jiehao did not do his homework?’  鲍比：因为 杰豪 总是 要 抄 她的 作业。  yinwei Jiehao zongshi yao chao tade zuoye  because Jiehao always want copy her homework  ‘Because Jiehao always wants to copy her homework.’ |
| 欧文：志杰 为什么 说 清雅 去 学校 了?  Zhijie weishenme shuo Qingya qu xuexiao le  Zhijie why say Qingya go school PERF  ‘Why did Zhijie *t* say that Qingya went to school?’  彼得：因为 他 看见 清雅 上 了 校巴。  yinwei ta kanjian Qingya shang le xiaoba  because he see Qingya take PERF school.bus  ‘Because he saw Qingya take the school bus.’ |
| 陈静：张元 为什么 说 李冰 不 吃 火锅？  Zhangyuan weishenme shuo Libing bu chi huoguo  Zhangyuan why say Libing not eat hotpot  ‘Why did Zhangyuan *t* say that Libing did not eat hotpot?’  静涵：因为 她 从没 见过 李冰 吃 火锅。  yinwei ta congmei jianguo Libing chi huoguo  because she never see Libing eat hotpot  ‘Because she has never seen Libing having hotpot.’ |
| 欧陆：小王 为什么 说 小琪 没 去 聚会?  Xiaowang weishenme shuo Xiaoqi mei qu juhui  Xiaowang why say Xiaoqi not go gathering  ‘Why did Xiaowang *t* say that Xiaoqi did not go to the gathering?’  之恩：因为 他 看到 小琪 独自 回家 了。  yinwei ta kandao Xiaoqi duzi huijia le  because he see Xiaoqi alone go.home PERF  ‘Because he saw Xiaoqi going home alone.’ |
| 林风：娜娜 为什么 说 颖儿 没有 帮忙 做 家务？  Nana weishenme shuo Yinger meiyou bangmang zuo jiawu  Nana why say Yinger not help do housework  ‘Why did Nana *t* say that Yinger did not help with the housework?’  小皮：因为 所有 家务 都是 她 做的。  yinwei suoyou jiawu doushi ta zuode  because all housework all she do  ‘Because she did all the housework by herself.’ |
| 欧文：菲菲 为什么 诬陷 莉莉 偷 钱 了?  Feifei weishenme wuxian Lili tou qian le  Feifei why frame Lili steal money PERF  ‘Why did Feifei *t* frame Lili for stealing money?’  赵欢：因为 她 不 喜欢 莉莉。  yinwei ta bu xihuan Lili  because she not like Lili  ‘Because she does not like Lili.’ |
| 小文：萧艾 为什么 说 邓伦 昨晚 没 回家？  Xiaoai weishenme shuo Denglun zuowan mei huijia  Xiaoai why say Denglun last.night not go.home  ‘Why did Xiaoai *t* say that Denglun did not go home last night?’  小曹：因为 他们 一起 去 酒吧 了。  yinwei tamen yiqi qu jiuba le  because they together go club PERF  ‘Because they went to the club together.’ |
| 欧豪：梓豪 为什么 说 小贞 喝酒 了？  Zihao weishenme shuo Xiaozhen hejiu le  Zihao why say Xiaozhen drink PERF  ‘Why did Zihao *t* say that Xiaozhen drank?’  玉儿：因为 他 闻到 了 很 浓烈的 酒味。  yinwei ta wendao le hen nongliede jiuwei  because he smell PERF very strong alcohol  ‘Because he smelled strong alcohol.’ |
| 蒙妍：小金 为什么 说 小朱 已经 卖掉 房子 了？  Xiaojin weishenme shuo Xiaozhu yijing maidiao fangzi le  Xiaojin why say Xiaozhu already sell house PERF  ‘Why did Xiaojin *t* say that Xiaozhu had sold her house?’  智妍：因为 她 看到 小朱 搬家 了。  yinwei ta kandao Xiaozhu banjia le  because she see Xiaozhu move PERF  ‘Because she saw Xiaozhu moving.’ |
| 小侯：梁秋 为什么 说 子文 已经 搬家 了？  Liangqiu weishenme shuo Ziwen yijing banjia le  Liangqiu why say Ziwen already move PERF  ‘Why did Liangqiu *t* say that Ziwen had already moved?’  晓黄：因为 她 家 现在 已经 住着 别人 了。  yinwei ta jia xianzai yijing zhuzhe bieren le  because her house now already live someone.else PERF  ‘Because someone else is already living in her house.’ |
| 温婉：英博 为什么 说 琪琪 把 门 拆 了？  Yingbo weishenme shuo Qiqi ba men chai le  Yingbo why say Qiqi BA door tear.down PERF  ‘Why did Yingbo *t* say that Qiqi tore down the door?’  文文：因为 他 怕 被 妈妈 骂。  yinwei ta pa bei mama ma  because he afraid be mother scold  ‘Because he was afraid of being scolded by mom.’ |
| Condition B | 莱纳：安娜 为什么 说 李明 逃课 了?  Anna weishenme shuo Liming taoke le  Anna for.what say Liming skip.class PERF  ‘For what purpose did Anna *t* say that Liming skipped the class?’  朱茵：为了 破坏 李明 的 名声。  weile pohuai Liming de mingsheng  in.order.to destroy Liming DEL reputation  ‘In order to destroy Liming’s reputation.’ |
| 英杰：俊杰 为什么 说 李洋 辞职 了?  Junjie weishenme shuo Liyang cizhi le  Junjie for.what say Liyang resign PERF  ‘For what purpose did Junjie *t* say that Liyang had resigned?’  佳杰：为了 引起 同事 们 的 注意。  weile yinqi tongshi men de zhuyi  in.order.to arise colleague PLU DEL attention  ‘In order to arise the colleagues’ attention.’ |
| 博超：刘颖 为什么 说 陈安 说谎 了?  Liuying weishenme shuo Chenan shuohuang le  Liuying for.what say Chenan tell.a.lie  ‘For what purpose did Liuying *t* say that Chenan had told a lie?’  文亚：为了 误导 大众。  weile wudao dazhong  in.order.to mislead public  ‘In order to mislead the public.’ |
| 赛芬：志安 为什么 说 成杰 去 医院 了?  Zhian weishenme shuo Chengjie qu yiyuan le  Zhian for.what say Chengjie go hospital  ‘For what purpose did Zhian *t* say that Chengjie went to the hospital?’  艾达：为了 散播 谣言。  weile sanbo yaoyan  in.order.to spread rumor  ‘In order to spread the rumor.’ |
| 马克：小赵 为什么 说 美美 参加 了 比赛?  Xiaozhao weishenme shuo Meimei canjia le bisai  Xiaozhao for.what say Meimei participate PERF competition  ‘For what purpose did Xiaozhao *t* say that Meimei participated in the competition?’  马伦：为了 鼓励 其他 同学。  weile guli qita tongxue  in.order.to encourage other student  ‘In order to encourage other students.’ |
| 布兰：孙艺 为什么 举报 杰豪 不 写 作业?  Sunyi weishenme jubao Jiehao bu xie zuoye  Sunyi for.what report Jiehao not write homework  ‘For what purpose did Sunyi *t* report that Jiehao did not do his homework?’  兰特：为了 得到 老师 的 表扬。  weile dedao laoshi de biaoyang  in.order.to get teacher DEL praise  ‘In order to get the teacher’s praise.’ |
| 菲比：志杰 为什么 说 清雅 去 学校 了?  Zhijie weishenme shuo Qingya qu xuexiao le  Zhijie for.what say Qingya go school PERF  ‘For what purpose did Zhijie *t* say that Qingya went to school?’  路易：为了 让 妈妈 放心。  weile rang mama fangxin  in.order.to let mom relieve  ‘In order to reassure mom.’ |
| 梦露：张元 为什么 说 李冰 不 吃 火锅？  Zhangyuan weishenme shuo Libing bu chi huoguo  Zhangyuan for.what say Libing not eat hotpot  ‘For what purpose did Zhangyuan *t* say that Libing did not eat hotpot?’  李晓：为了 去 她自己 想 去 的 餐厅。  weile qu taziji xiang qu de canting  in.order.to go herself want go DEL restaurant  ‘In order to go to the restaurant she wanted to go.’ |
| 小金：小王 为什么 说 小琪 没 去 聚会?  Xiaowang weishenme shuo Xiaoqi mei qu juhui  Xiaowang for.what say Xiaoqi not go gathering  ‘For what purpose did Xiaowang *t* say that Xiaoqi did not go to the gathering?’  鲁平：为了 保护 小琪。  weile baohu Xiaoqi  in.order.to protect Xiaoqi  ‘In order to pretect Xiaoqi.’ |
| 小菲：娜娜 为什么 说 颖儿 没有 帮忙 做 家务？  Nana weishenme shuo Yinger meiyou bangmang zuo jiawu  Nana for.what say Yinger not help do housework  ‘For what purpose did Nana *t* say that Yinger did not help with the housework?’  小卢：为了 让 妈妈 批评 颖儿。  weile rang mama piping Yinger  in.order.to let mom criticize Yinger  ‘In order to let mom criticize Yinger.’ |
| 菲比：菲菲 为什么 诬陷 莉莉 偷 钱 了?  Feifei weishenme wuxian Lili tou qian le  Feifei for.what frame Lili steal money PERF  ‘For what purpose did Feifei *t* frame Lili for stealing money?’  伊蓉：为了 让 朋友 们 都 讨厌 她。  weile rang pengyou men dou taoyan ta  in.order.to let friend PLU all hate her  ‘In order to make all her friends hate her.’ |
| 小文：萧艾 为什么 说 邓伦 昨晚 没 回家？  Xiaoai weishenme shuo Denglun zuowan mei huijia  Xiaoai for.what say Denglun last.night not go.home  ‘For what purpose did Xiaoai *t* say that Denglun did not go home last night?’  小水：为了 引起 他 女朋友 的 怀疑。  weile yinqi ta nvpengyou de huaiyi  in.order.to arise his girlfriend DEL suspicion  ‘In order to arise his firlfriend’s suspicion.’ |
| 晓芬：梓豪 为什么 说 小贞 喝酒 了？  Zihao weishenme shuo Xiaozhen hejiu le  Zihao for.what say Xiaozhen drink PERF  ‘For what purpose did Zihao *t* say that Xiaozhen drank?’  小萍：为了 把 事故 归咎 于 她。  weile ba shigu guijiu yu ta  in.order.to BA accident blame to her  ‘In order to blame him for the accident.’ |
| 楠楠：小金 为什么 说 小朱 已经 卖掉 房子 了？  Xiaojin weishenme shuo Xiaozhu yijing maidiao fangzi le  Xiaojin for.what say Xiaozhu already sell house PERF  ‘For what purpose did Xiaojin *t* say that Xiaozhu had sold her house?’  静宜：为了 博得 大家 的 同情。  weile bode dajia de tongqing  in.order.to win everyone DEL sympathy  ‘In order to win everyone’s sympathy.’ |
| 菲比：梁秋 为什么 说 子文 已经 搬家 了？  Liangqiu weishenme shuo Ziwen yijing banjia le  Liangqiu for.what say Ziwen already move PERF  ‘For what purpose did Liangqiu *t* say that Ziwen had already moved?’  小燕：为了 让 她 前男友 别 再 纠缠 她。  weile rang ta qiannanyou bie zai jiuchan ta  in.order.to let her ex.boyfriend not again tangle her  ‘In order to make her ex-boyfriend stop tangling her.’ |
| 菲尔：英博 为什么 说 琪琪 把 门 拆 了？  Yingbo weishenme shuo Qiqi ba men chai le  Yingbo for.what say Qiqi BA door tear.down PERF  ‘For what purpose did Yingbo *t* say that Qiqi tore down the door?’  依依：为了 推卸 责任。  weile tuixie zeren  in.order.to shirk responsibility  ‘In order to shirk the responsibility.’ |
| Condition C | 1. 杰克：安娜 说 李明 为什么 逃课 了？   Anna shuo Liming weishenme taoke le  Anna say Liming why skip.class PERF  ‘Why did Anna say that Liming *t* skipped the class?’  丽芬：她 说 李明 因为 不 喜欢 那 门 课 所以 逃课 了。  ta shuo Liming yinwei bu xihuan na men ke suoyi taoke le  she say Liming because not like that CL course so skip.class PERF  ‘She said that Liming skipped the class because he didn’t like that course.’ |
| 1. 清怡：俊杰 说 李洋 为什么 辞职 了？   Junjie shuo Liyang weishenme cizhi le  Junjie say Liyang why resign PERF  ‘Why did Junjie say Liyang *t* had resigned?’  新荣：他 说 李洋 因为 工资 太 低 所以 辞职 了。  ta shuo Liyang yinwei gongzi tai di suoyi cizhi le  he say Liyang because salary too low so resign PERF  ‘He said that Liyang had resigned because the salary was too low.’ |
| 1. 狄伦：刘颖 说 陈安 为什么 说谎 了？   Liuying shuo Chenan weishenme shuohuang le  Liuying say Chenan why tell.a.lie PERF  ‘Why did Liuying say that Chenan *t* had told a lie?’  额尔：她 说 陈安 因为 害怕 惩罚 所以 说谎 了。  ta shuo Chenan yinwei haipa chengfa suoyi shuohuang le  she say Chenan because afraid punish so tell.a.lie PERF  ‘She said that Chenan lied because she was afraid of being punished.’ |
| 1. 哈里：志安 说 成杰 为什么 去 医院 了？   Zhian shuo Chengjie weishenme qu yiyuan le  Zhian say Chengjie why go hospital PERF  ‘Why did Zhian say that Chengjie *t* went to the hospital?’  哈伦：他 说 成杰 因为 发烧 去 医院 了。  ta shuo Chengjie yinwei fashao qu yiyuan le  he say Chengjie because fever go hospital PERF  ‘He said that Chengjie went to the hospital because he had a fever.’ |
| 1. 马丁：小赵 说 美美 为什么 参加 了 比赛？   Xiaozhao shuo Meimei weishenme canjia le bisai  Xiaozhao say Meimei why participate PERF competition  ‘Why did Xiaozhao say that Meimei *t* participated in the competition?’  玛西：他 说 美美 因为 想 证明 自己 所以 参加 了 比赛。  ta shuo Meimei yinwei xiang zhengming ziji suoyi canjia le bisai  he say Meimei because want prove self so participate PERF competition |
| 1. 杜克：孙艺 举报 杰豪 为什么 不 写 作业？   Sunyi jubao Jiehao weishenme bu xie zuoye  Sunyi report Jiehao why not write homework  ‘Why did Sunyi report Jiehao *t* didn’t do his homework?’  伊桑：她 举报 杰豪 因为 玩 游戏 不 写 作业。  ta jubao Jiehao yinwei wan youxi bu xie zuoye  she report Jiehao because play game not write homework  ‘She reported that Jiehao didn’t do his homework because he was playing games.’ |
| 1. 马克：志杰 说 清雅 为什么 去 学校 了？   Zhijie shuo Qingya weishenme qu xuexiao le  Zhijie say Qingya why go school PERF  ‘Why did Zhijie say that Qingya *t* went to school?’  理查：他 说 清雅 因为 要 参加 期末 考试 所以 去 学校 了。  ta shuo Qingya yinwei yao canjia qimo kaoshi suoyi qu xuexiao le  he say Qingya because need attend final exam so go school PERF  ‘He said that Qingya went to school because she need to take the final exam.’ |
| 1. 静雅：张元 说 李冰 为什么 不 吃 火锅？   Zhangyuan shuo Libing weishenme bu chi huoguo  Zhangyuan say Libing why not eat hotpot  ‘Why did Zhangyuan say that Libing *t* didn’t eat hotpot.’  小丽：他 说 李冰 因为 减肥 所以 不 吃 火锅。  ta shuo Libing yinwei jianfei suoyi bu chi huoguo  he say Libing because lose.weight so not eat hotpot  ‘He said that Libing didn’t eat hotpot because she had to lose weight.’ |
| 1. 小马：小王 说 小琪 为什么 没 去 聚会？   Xiaowang shuo Xiaoqi weishenme mei qu juhui  Xiaowang say Xiaoqi why not go gathering  ‘Why did Xiaowang say that Xiaoqi *t* didn’t go to the gathering?’  小茶：他 说 小琪 因为 家里 有 事 所以 没 去 聚会。  ta shuo Xiaoqi yinwei jiali you shi suoyi mei qu juhui  he say Xiaoqi because home have event so not go gathering  ‘He said that Xiaoqi didn’t go to the gathering because of some family issues.’ |
| 1. 小柯：娜娜 说 颖儿 为什么 没有 帮忙 做 家务？   Nana shuo Yinger weishenme meiyou bangmang zuo jiawu  Nana say Yinger why not help do housework  ‘Why did Nana say that Yinger *t* didn’t help with the housework?’  晓丽：她 说 颖儿 因为 不 舒服 所以 没有 帮忙。  ta shuo Yinger yinwei bu shufu suoyi meiyou bangmang  she say Yinger because not well so not help  ‘She said that Yinger didn’t help because she was not feeling well.’ |
| 1. 马克：菲菲 诬陷 莉莉 为什么 偷 钱 了？   Feifei wuxian Lili weishenme tou qian le?  Feifei frame Lili why steal money PERF  ‘Why did Feifei frame Lili *t* for stealing money?’  李雷：她 诬陷 莉莉 因为 妒忌 别人 所以 偷 钱 了。  ta wuxian Lili yinwei duji bieren suoyi tou qian le  she frame Lili because envy others so steal money PERF  ‘She framed Lili for stealing money because she envied others.’ |
| 1. 晓琳：萧艾 说 邓伦 昨晚 为什么 没 回家？   Xiaoai shuo Denglun zuowan weisheme mei huijia  Xiaoai say Denglun last.night why not go.home  ‘Why did Xiaoai say that Denglun *t* didn’t go home last night?’  小吉：她 说 邓伦 昨晚 因为 喝醉 了 所以 没 回家。  ta shuo Denglun zuowan yinwei hezui le suoyi mei huijia  she say Denglun last.night because drunk PERF so not go.home  ‘She said that Denglun didn’t go home last night because he was drunk.’ |
| 1. 玛丽：梓豪 说 小贞 为什么 喝酒 了？   Zihao shuo Xiaozhen weishenme hejiu le  Zihao say Xiaozhen why drink PERF  ‘Why did Zihao say that Xiaozhen *t* drank alcohol?’  晓德：他 说 小贞 因为 失恋 所以 喝酒 了。  ta shuo Xiaozhen yinwei shilian suoyi hejiu le  he say Xiaozhen because break.up so drink PERF  ‘He said that Xiaozhen drank alcohol because she broke up with her boyfriend.’ |
| 1. 小思：小金 说 小朱 为什么 已经 卖掉 了 房子 了？   Xiaojin shuo Xiaozhu weishenme yijing maidiao le fangzi le  Xiaojin say Xiaozhu why already sell PERF house PERF  ‘Why did Xiaojin say Xiaozhu *t* had sold her house?’  小茵：他 说 小朱 因为 还 不 起 钱 已经 卖掉 了 房子 了。  ta shuo Xiaozhu yinwei huan bu qi qian yijing maidiao le fangzi le  he say Xiaozhu because return not afford money already sell house PERF  ‘He said that Xiaozhu had sold his house because he couldn't afford to return the money.’ |
| 1. 马艳：梁秋 说 子文 为什么 已经 搬家 了？   Liangqiu shuo Ziwen weishenme yijing banjia le?  Liangqiu say Ziwen why already move PERF  ‘Why did Liangqiu say that Ziwen *t* had moved?’  家俊：她 说 子文 因为 工作 调动 已经 搬家 了。  ta shuo Ziwen yinwei gongzuo diaodong yijing banjia le  she say Ziwen because work transfer already move PERF  ‘She said that Ziwen had moved because she was transferred to another job.’ |
| 1. 可可：英博 说 琪琪 为什么 把 门 拆 了？   Yingbo shuo Qiqi weishenme ba men chai le?  Yingbo say Qiqi why BA door tear PERF  ‘Why did Yingbo say that Qiqi *t* tore down the door?’  明媚：他 说 琪琪 因为 觉得 门 不 好看 所以 把 它 拆 了。  Ta shuo Qiqi yinwei juede men bu haokan suoyi ba ta chai le  he say Qiqi because think door not beautiful so BA it tear.doen Pref  ‘He said that Qiqi tore down the door because she thought the door not beautiful.’ |
| Condition  D | 1. 提芬：安娜 说 李明 为什么 逃课 了？   Anna shuo Liming weishenme taoke le  Anna say Liming for.what skip.class PERF  ‘For what purpose did Anna say that Liming *t* skipped the class?’  玛丽：她 说 李明 为了 玩 游戏 逃课 了。  ta shuo Liming weile wan youxi taoke le  she say Liming in.order.to play game skip.class PERF  ‘She said that Liming skipped the class in order to play games.’ |
| 1. 杰伟：俊杰 说 李洋 为什么 辞职 了？   Junjie shuo Liyang weishenme cizhi le  Junjie say Liyang for.what resign PERF  ‘For what purpose did Junjie say Liyang *t* had resigned?’  卢杰：他 说 李洋 为了 照顾 小孩 辞职 了。  ta shuo Liyang weile zhaogu xiaohai cizhi le  he say Liyang in.order.to look.after children resign PERF  ‘He said that Liyang resigned in order to look after his children.’ |
| 1. 艾德：刘颖 说 陈安 为什么 说谎 了？   Liuying shuo Chenan weishenme shuohuang le  Liuying say Chenan for.what tell.a.lie PERF  ‘For what purpose did Liuying say that Chenan *t* had told a lie?’  艾伦：她 说 陈安 为了 不 被 惩罚 所以 说谎 了。  ta shuo Chenan weile bu bei chengfa suoyi shuohuang le  she say Chenan in.order.to not be punished so tell.a.lie PERF  ‘She said that Chenan told a lie in order not to be punished.’ |
| 1. 亨利：志安 说 成杰 为什么 去 医院 了？   Zhian shuo Chengjie weishenme qu yiyuan le  Zhian say Chengjie for.what go hospital PERF  ‘For what purpose did Zhian say that Chengjie *t* went to the hospital?’  海勒：他 说 成杰 为了 探望 朋友 所以 去 医院 了。  Ta shuo Chengjie weile tanwang pengyou suoyi qu yiyuan le  she say Chengjie in.order.to visit friend so go hospital PERF  ‘She said that Chengjie went to the hospital in order to visit his friend.’ |
| 1. 马文：小赵 说 美美 为什么 参加 了 比赛？   Xiaozhao shuo Meimei weishenme canjia le bisai  Xiaozhao say Meimei for.what participate PERF competition  ‘For what purpose did Xiaozhao say that Meimei *t* participated in the comprtiotion?’  马特：他 说 美美 为了 证明 自己 所以 参加 了 比赛。  Ta shuo Meimei weile zhengming ziji suoyi canjia le bisai  he say Meimei in.order.to prove self so participate PERF competition  ‘He said that Meimei participated in the competition in order to prove herself.’ |
| 1. 刘震：孙艺 举报 杰豪 为什么 不 写 作业？   Sunyi jubao Jiehao weishenme bu xie zuoye  Sunyi report Jiehao for.what not write homework  ‘For what purpose did Sunyi report Jiehao *t* didn’t do his homework?’  埃文：她 举报 杰豪 为了 偷懒 不 写 作业。  Ta juebao Jiehao weile toulan bu xie zuoye  she report Jiehao in.order.to mike not write homework  ‘She reported that Jiehao didn't do his homework in order to mike.’ |
| 1. 里奇：志杰 说 清雅 为什么 去 学校 了？   Zhijie shuo Qingya weishenme qu xuexiao le  Zhijie say Qingya for.what go school PERF  ‘For what purpose did Zhijie say that Qingya *t* went to school?’  佛农：他 说 清雅 为了 写 论文 去 了 学校。  ta shuo Qianya weile xie lunwen qu le xuexiao  he say Qianya in.order.to write thesis go PERF school  ‘He said that Qianya went to school in order to work on her thesis.’ |
| 1. 静姝：张元 说 李冰 为什么 不 吃 火锅？   Zhangyuan shuo Libing weishenme bu chi huoguo  Zhangyuan say Libing for.what not eat hotpot  ‘For what purpose did Zhangyuan say that Libing *t* didn’t eat hotpot.’  心心：他 说 李冰 为了 减肥 不 吃 火锅。  ta shuo Libing weile jianfei bu chi huoguo  he say Libing in.order.to lose.weight not eat hotpot  ‘He said that Libing did not eat hotpot in order to lose weight.’ |
| 1. 小丽：小王 说 小琪 为什么 没 去 聚会？   Xiaowang shuo Xiaoqi weishenme mei qu juhui  Xiaowang say Xiaoqi for.what not go gathering  ‘For what purpose did Xiaowang say that Xiaoqi *t* didn’t go to the gathering?’  小农：他 说 小琪 为了 早点 写 完 作业 所以 没 去 聚会。  ta shuo Xiaoqi weile zaodian xie wan zuoye suoyi mei qu juhui  he say Xiaoqi in.order.to early write finish homework so not go gathering |
| 1. 小柯：娜娜 说 颖儿 为什么 没有 帮忙 做 家务？   Nana shuo Yinger weishenme meiyou bangmang zuo jiawu  Nana say Yinger for.what not help do housework  ‘For what purpose did Nana say that Yinger *t* didn’t help with the housework?’  小佛：她 说 颖儿 为了 看 电视 没有 帮忙 做 家务。  ta shuo Yinger weile kan dianshi meiyou bangmang zuo jiawu  she say Yinger in.order.to watch TV not help do housework  ‘She said that Yinger didn't help with the housework in order to watch TV.’ |
| 1. 里奇：菲菲 诬陷 莉莉 为什么 偷 钱 了？   Feifei wuxian Lili weishenme tou qian le?  Feifei frame Lili for.what steal money PERF  ‘For what purpose did Feifei frame Lili *t* for stealing money?’  小景：她 诬陷 莉莉 为了 整容 偷 钱 了。  ta wuxian Lili weile zhengrong tou qian le  she frame Lili in.order.to cosmetic surgery steal money Pref  ‘She framed Lili for stealing money in order to receive cosmetic surgery.’ |
| 1. 小朵：萧艾 说 邓伦 昨晚 为什么 没 回家？   Xiaoai shuo Denglun zuowan weisheme mei huijia  Xiaoai say Denglun last.night for.what not go.home  ‘For what purpose did Xiaoai say that Denglun *t* didn’t go home last night?’  佛农：她 说 邓伦 为了 加班 赶 报表 所以 没 回家。  ta shuo Denglun weile jiaban gan baobiao suoyi mei huijia  she say Denglun in.order.to overtime do report so not back.home  ‘She said that Denglun didn't go home in order to work overtime to finish the report.’ |
| 1. 马原：梓豪 说 小贞 为什么 喝酒 了？   Zihao shuo Xiaozhen weishenme hejiu le  Zihao say Xiaozhen for.what drink PERF  ‘For what purpose did Zihao say that Xiaozhen *t* drank alcohol?’  志明：他 说 小贞 为了 庆祝 生日 所以 喝酒 了。  ta shuo Xiaozhen weile qingzhu shengri suoyi hejiu le  he say Xiaozhen in.order.to celebrate birthday so drink PERF  ‘He said that Xiaozhen drank in order to celebrate his birthday.’ |
| 1. 里奇：小金 说 小朱 为什么 已经 卖掉 了 房子 了？   Xiaojin shuo Xiaozhu weishenme yijing maidiao le fangzi le  Xiaojin say Xiaozhu for.what already sell PERF house PERF  ‘For what purpose did Xiaojin say Xiaozhu *t* had sold her house?’  陈毅：他 说 小朱 为了 给 妈妈 治病 已经 卖掉了 房子 了。  ta shuo Xiaozhu weile gei mama zhibing yijing maidiao fangzi le  he say Xiaozhu in.order.to give mom cure already sell house PERF  ‘He said that Xiaozhu had sold his house in order to get his mom cured.’ |
| 1. 马艳：梁秋 说 子文 为什么 已经 搬家 了？   Liangqiu shuo Ziwen weishenme yijing banjia le?  Liangqiu say Ziwen for.what already move PERF  ‘For what purpose did Liangqiu say that Ziwen *t* had moved?’  加峰：她 说 子文 为了 摆脱 前男友 的 纠缠 已经 搬家 了。  ta shuo Ziwen weile baituo qiannanyou de jiuchan yijing banjia le  she say Ziwen in.order.to get.rid.of ex-boyfriend REL tangle already move PERF  ‘She said that Ziwen had already move in order to get rid of the entanglement of her ex-  boyfriend. |
| 1. 皑皑：英博 说 琪琪 为什么 把 门 拆 了？   Yingbo shuo Qiqi weishenme ba men chai le?  Yingbo say Qiqi why BA door tear PERF  ‘Why did Yingbo say that Qiqi *t* tore down the door?’  冰冰：他 说 琪琪 为了 让 房间 看起来 大 一点 所以 把 门 拆 了。  ta shuo Qiqi weile rang fangjian kanqilai da yidian suoyi ba men chai le  he say Qiqi in.order.to let room look big little so BA door tear.down PERF  ‘He said that Qiqi tore down the door in order to make the room look a bit bigger.’ |
| Condition E | 1. 奥文：安娜 为什么 骂 了 逃课 的 学生？   Anna weishenme ma le taoke de xuesheng  Anna why scold PERF skip.class REL student  ‘Why did Anna *t* scold the student who skipped the class?’  雷娜：因为 她 太 生气 了。  yinwei ta tai shengqi le  because she too angry PERF  ‘Because she was too angry.’ |
| 1. 杰西：俊杰 早上 为什么 见 了 辞职 的 员工？   Junjie zaoshang weishenme jian le cizhi de yuangong  Junjie morning why meet PERF resign REL staff  ‘Why did Junjie *t* meet the staff who had resigned this morning?’  戴安：因为 他 想 知道 他 为什么 辞职 了。  yinwei ta xiang zhidao ta weishenme cizhi le  because he want know he why resign PERF  ‘Because he wanted to know why he has resigned.’ |
| 1. 伊登：刘颖 为什么 见 了 说谎 的 同学？   Liuying weishenme jian le shuohuang de tongxue  Liuying why meet PERF tell.a.lie REL classmate  ‘Why did Liuying *t* meet the classmate who told a lie?’  德华：因为 她 相信 她 没有 说谎。  yinwei ta xiangxin ta meiyou shuohuang  because she believe she not tell.a.lie  ‘Because she believed that she didn't lie.’ |
| 1. 霍根：志安 为什么 见 了 进 了 医院 的 朋友？   Zhian weishenme jian le jin le yiyuan de pengyou  Zhian why meet PERF go PERF hospital REL friend  ‘Why did Zhian *t* meet the friend who went to the hospital?’  汉特：因为 他 想 看看 他 好 点 了 没。  yinwei ta xiang kankan ta hao dian le mei  because he want see him well some PERF not  ‘Because he wanted to see whether he was feeling better or not.’ |
| 1. 摩尔：小赵 为什么 表扬 了 参加 了 比赛 的 女孩？   Xiaozhao weishenme biaoyang le canjia le bisai de nvhai  Xiaozhao why praise PERF participate PERF competition REL girl  ‘Why did Xiaozhao *t* praise the girl who participated in the competition?’  尼克：因为 他 想 鼓励 她 继续 努力。  yinwei ta xiang guli ta jixu nuli  because he want encourage her continue try  ‘Because he wanted to encourage her to keep trying.’ |
| 1. 加里：孙艺 为什么 举报 了 不 写 作业 的 同学？   Sunyi weishenme jubao le bu xie zuoye de tongxue  Sunyi why report PERF not write homework REL classmate  ‘Why did Sunyi *t* report the classmate who didn't do his homework?’  基诺：因为 那 个 同学 总是 想要 抄 她的 作业。  yinwei na ge tongxue zongshi xiangyao chao tade zuoye  because that CL classmate always want copy her homework  ‘Because that classmate always wanted to copy her homework.’ |
| 1. 西蒙：志杰 为什么 联系 了 要 去 学校 的 同学？   Zhijie weishenme lianxi le yao qu xuexiao de tongxue  Zhijie why contact PERF want go school REL classmate  ‘Why did Zhijie *t* contact the classmate who was going to school?’  韦恩：因为 他 想 和 她 一起 去。  yinwei ta xiang he ta yiqi qu  because he want with him together go  ‘Because he wanted to go with him.’ |
| 1. 欣欣：张元 为什么 约 了 不 吃 火锅 的 女孩？   Zhangyuan weishenme yue le bu chi huoguo de nvhai  Zhangyuan why date PERF not eat hotpot REL girl  ‘Why did Zhangyuan *t* date the girl who did not eat hotpot?’  静静：因为 她 也 不 吃 火锅。  yinwei ta ye bu chi huoguo  because she also not eat hotpot  ‘Because she doesn't eat hotpot, too.’ |
| 1. 小西：小王 为什么 要 了 没 去 聚会 的 男孩 的 联系方式？   Xiaowang weishenme yao le mei qu juhui de nanhai de lianxifangshi  Xiaowang why ask PERF not go gathering REL boy REL TEL  ‘Why did Xiaowang *t* asked for the contact details of the boy who didn’t go to the gathering.’  小微：因为 他 想 邀请 他 下次 一起 去。  yinwei ta xaing yaoqing ta xiaci yiqi qu  because he want invite him next.time together go  ‘Because he wanted to invite him to go together next time.’ |
| 1. 小梦：妈妈 为什么 批评 了 没有 帮忙 做 家务 的 孩子？   Mama weishenme piping le meiyou bangmang zuo jiawu de haizi  mom why criticize PERF not help do housework REL child  ‘Why did mom *t* criticize the child who didn't help with the housework?’  小威：因为 她 想 培养 孩子 的 责任心。  yinwei ta xaing peiyang haizi de zerenxin  because she want develop child REL responsibility  ‘Because she wanted to develop her children's responsibility.’ |
| 1. 小贝：菲菲 为什么 打 了 偷 钱 的 女孩？   Feifei weishenme da le tou qian de nvhai  Feifei why beat PERF steal money REL girl  ‘Why did Feifei *t* beat the girl who stole money?’  恩恩：因为 这 已经 不是 她 第一次 偷 钱 了。  yinwei zhe yijing bushi ta diyici tou qian le  because this already not her first.time steal money PERF  ‘Because this was not her first time to steal money.’ |
| 1. 利维：萧艾 为什么 见 了 昨晚 没 回家 的 朋友？   Xiaoai weishenme jian le zuowan mei huijia de pengyou  Xiaoai why meet PERF last.night not go.home REL friend  ‘Why did Xiaoai *t* meet the friend who didn't go home last night?’  小樱：因为 她 想 确认 一下 他 是否 还 好。  yinwei ta xiang queren yixia ta shifou hai hao  because she want make.sure once he yes.not still well  ‘Because she wanted to make sure whether he is still well or not.’ |
| 1. 伟利：梓豪 为什么 见 了 要 喝酒 的 朋友？   Zihao weishenme jian le want hejiu de pengyou  Zihao why meet PERF want drink REL friend  ‘Why did Zihao *t* meet the friend who was going to have a drink.’  小青：因为 他 想 和 他 一起 喝。  yinwei ta xiang he ta yiqi he  because he want with him together drink  ‘Because he wanted to drink with him.’ |
| 1. 志伟：小金 为什么 见 了 要 卖 房子 的 人？   Xiaojin weishenme jian le yao mai fangzi de ren  Xiaojin why meet PERF want sell house REL person  ‘Why did Xiaojin *t* meet the people who was selling his house?  小鹏：因为 他 想 当面 确认 一下。  yinwei ta xiang dangmian queren yixia  because he want in.person comfirm once  ‘Because he wanted to confirm in person.’ |
| 1. 晓芬：梁秋 为什么 联系 了 要 搬家 的 女孩？   Liangqiu weishenme lianxi le yao banjia de nvhai  Liangqiu why contact PERF want move REL girl  ‘Why did Liangqiu *t* contact the girl who was going to move?’  小莉：因为 她 想 看看 她 需 不 需要 帮忙。  yinwei ta xiang kankan ta xu bu xuyao bangmang  because she want see she need not need help  ‘Because she wanted to know that whether she need help or not.’ |
| 1. 聪聪：英博 为什么 骂 了 把 门 拆 了 的 女孩？   Yingbo weishenme ma le ba men chai le de nvhai  Yingbo why scold PERF BA door tear.down PERF REL girl  ‘Why did Yingbo *t* scolded the girl who tore down the door?’  多多：因为 那 扇 门 是 他 最 喜欢 的。  yinwei na shan men shi ta zui xihuan de  because that CL door is he most like REL  ‘Because that door is his favorite.’ |
| Condition F | 1. 李青：安娜 为什么 骂 了 逃课 的 学生？   Anna weishenme ma le taoke de xuesheng  Anna for.what scold PERF skipp.class REL student  ‘For what purpose did Anna *t* scold the student who skipped the class?’  小莹：为了 教育 他。  weile jioayu ta  in.order.to educate him  ‘In order to educate him.’ |
| 1. 雅芙：俊杰 早上 为什么 见 了 辞职 的 员工？   Junjie zaoshang weishenme jian le cizhi de yuangong  Junjie morning for.what meet PERF resign REL staff  ‘For what purpose did Junjie *t* meet the staff who had resigned this morning?’  婉婷：为了 完成 工作 交接。  weile wancheng gongzuo jiaojie  in.order.to complete work transfer  ‘In order to complete the work transfer.’ |
| 1. 伊莱：刘颖 为什么 见 了 说谎 的 同学？   Liuying weishenme jian le shuohuang de tongxue  Liuying for.what meet PERF tell.a.lie REL classmate  ‘For what purpose did Liuying *t* meet the classmate who told a lie?’  爱丽：为了 找出 真相。  weile zhaochu zhenxiang  in.order.to find.out truth  ‘In order to find out the truth.’ |
| 1. 伊恩：志安 为什么 见 了 进 了 医院 的 朋友？   Zhian weishenme jian le jin le yiyuan de pengyou  Zhian for.what meet PERF go PERF hospital REL friend  ‘For what purpose did Zhian *t* meet the friend who went to the hospital?’  艾凡：为了 看看 他 好 点 了 没。  weile kankan ta hao dian le mei  in.order.to see him well some PERF not  ‘In order to see whether he was feeling better or not.’ |
| 1. 纽曼：小赵 为什么 表扬 了 参加 了 比赛 的 女孩？   Xiaozhao weishenme biaoyang le canjia le bisai de nvhai  Xiaozhao for.what praise PERF participate PERF competition REL girl  ‘For what purpose did Xiaozhao *t* praise the girl who participated in the competition?’  亚纶：为了 鼓励 她 继续 努力。  weile guli ta jixu nuli  in.order.to encourage her continue try  ‘In order to encourage her to keep trying.’ |
| 1. 格林：孙艺 为什么 举报 了 不 写 作业 的 同学？   Sunyi weishenme jubao le bu xie zuoye de tongxue  Sunyi or.what report PERF not write homework REL classmate  ‘For what purpose did Sunyi *t* report the classmate who didn't do his homework?’  克里：为了 得到 老师 的 表扬。  weile dedao laoshi de biaoyang  in.order.to get teacher REL praise  ‘In order to get the teacher's praise.’ |
| 1. 维克：志杰 为什么 联系 了 要 去 学校 的 同学？   Zhijie weishenme lianxi le yao qu xuexiao de tongxue  Zhijie for.what contact PERF want go school REL classmate  ‘For what purpose did Zhijie *t* contact the classmate who was going to school?’  扎克：为了 和 她 一起 去。  weile he ta yiqi qu  in.order.to with him together go  ‘In order to go with him.’ |
| 1. 克里：张元 为什么 约 了 不 吃 火锅 的 女孩？   Zhangyuan weishenme yue le bu chi huoguo de nvhai  Zhangyuan for.what date PERF not eat hotpot REL girl  ‘For what purpose did Zhangyuan *t* date the girl who did not eat hotpot?’  里昂：为了 和 她 交 朋友。  weile he ta jiao pengyou  in.order.to with her make friend  ‘In order to make friends with her.’ |
| 1. 小伟：小王 为什么 要 了 没 去 聚会 的 男孩 的 联系方式？   Xiaowang weishenme yao le mei qu juhui de nanhai de lianxifangshi  Xiaowang for.what ask PERF not go gathering REL boy REL TEL  ‘For what purpose did Xiaowang *t* asked for the contact details of the boy who didn’t go to the  gathering.’  小可：为了 邀请 他 下次 一起 去。  weile yaoqing ta xiaci yiqi qu  in.order.to invite him next.time together go  ‘In order to invite him to go together next time.’ |
| 1. 晓伟：妈妈 为什么 批评 了 没有 帮忙 做 家务 的 孩子？   Mama weishenme piping le meiyou bangmang zuo jiawu de haizi  mom for.what criticize PERF not help do housework REL child  ‘For what purpose did mom *t* criticize the child who didn't help with the housework?’  小扎：为了 培养 孩子 的 责任心。  weile peiyang haizi de zerenxin  in.order.to develop child REL responsibility  ‘In order to develop her children's responsibility.’ |
| 1. 小九：菲菲 为什么 打 了 偷 钱 的 女孩？   Feifei weishenme da le tou qian de nvhai  Feifei for.what beat PERF steal money REL girl  ‘For what purpose did Feifei *t* beat the girl who stole money?’  小莫：为了 让 她 不 再 犯 错。  weile rang ta bu zai fan cuo  in.order.to let her no again make mistake  ‘In order to let her not make the mistake again.’ |
| 1. 小珂：萧艾 为什么 见 了 昨晚 没 回家 的 朋友？   Xiaoai weishenme jian le zuowan mei huijia de pengyou  Xiaoai for.what meet PERF last.night not go.home REL friend  ‘For what purpose did Xiaoai *t* meet the friend who didn't go home last night?’  曼丽：为了 确认 他 是 否 还 好。  weile queren ta shi fou hai hao  in.order.to comfirm he is not still well  ‘In order to make sure whether he is fine.’ |
| 1. 小伟：梓豪 为什么 见 了 要 喝酒 的 朋友？   Zihao weishenme jian le want hejiu de pengyou  Zihao for.what meet PERF want drink REL friend  ‘For what purpose did Zihao *t* meet the friend who was going to have a drink.’  小沫：为了 和 他 一起 喝。  weile he ta yiqi he  in.order.to with him together drink  ‘In order to drink with him.’ |
| 1. 子俊：小金 为什么 见 了 要 卖 房子 的 人？   Xiaojin weishenme jian le yao mai fangzi de ren  Xiaojin for.what meet PERF want sell house REL person  ‘For what purpose did Xiaojin *t* meet the people who was selling his house?  珍安：为了 当面 确认 一下。  weile dangmian queren yixia  in.order.to in.person comfirm once  ‘In order to confirm in person.’ |
| 1. 晓芬：梁秋 为什么 联系 了 要 搬家 的 女孩？   Liangqiu weishenme lianxi le yao banjia de nvhai  Liangqiu for.what contact PERF want move REL girl  ‘For what purpose did Liangqiu *t* contact the girl who was going to move?’  曼曼：为了 提供 帮助。  weile tigong bangzhu  in.order.to offer help  ‘In order to offer help.’ |
| 1. 小娥：英博 为什么 骂 了 把 门 拆 了 的 女孩？   Yingbo weishenme ma le ba men chai le de nvhai  Yingbo why scold PERF BA door tear.down PERF REL girl  ‘Why did Yingbo *t* scolded the girl who tore down the door?’  芬芳：为了 让 她 意识到 自己 的 错误。  Weile rang ta yishidao ziji de cuowu  in.order.to let her know self REL mistake  ‘In order to let her realize her mistake.’ |
| Condition G | 1. 韩雪：安娜 骂 了 为什么 逃课 的 学生？   Anna ma le weishenme taoke de xuesheng?  Anna scold PERF why skipp.class REL student  ‘Why did Anna scold the student who *t* skipped the class?’  冯西：她 骂 了 那 个 因为 不 喜欢 那 门 课 而 逃课 的 学生。  ta ma le na ge yinwei bu xihuan na men ke er taoke de xuesheng  she scold PERF that CL because not like that CL course so skipp.class REL student  ‘She scolded the student who skipped the class because he didn’t like that course.’ |
| 1. 雅琳：俊杰 早上 见 了 为什么 辞职 的 员工？   Junjie zaoshang jian le weishenme cizhi de yuangong  Junjie morning meet PERF why resign REL staff  ‘Why did Junjie meet the staff who *t* had resigned this morning?’  佩琳：他 见 了 那 个 因为 工资 太 低 而 辞职 了 的 员工。  ta jian le na ge yinwei gongzi tai di suoyi cizhi le de yuangong  he meet PERF that CL because salary too low so resign PERF REL staff  ‘He met the staff who resigned because the salary was too low.’ |
| 1. 尤金：刘颖 见 了 为什么 说谎 的 同学？   Liuying jian le weishenme shuohuang de tongxue  Liuying meet PERF why lie REL classmate  ‘Why did Liuying meet the classmate who *t* told a lie?’  尔文：她 见 了 那 个 因为 害怕 惩罚 所以 说谎 了 的 同学。  ta jian le na ge yinwei haipa chengfa suoyi shuohuang le de tongxue  she meet PERF that CL because afraid punish so tell.a.lie PERF REL classmate  ‘She met the classmate who lied because she was afraid of punishment.’ |
| 1. 艾勒：志安 见 了 为什么 进 了 医院 的 朋友？   Zhian jian le weishenme jin le yiyuan de pengyou  Zhian meet Perf why go PERF hospital REL friend  ‘Why did Zhian meet the friend who *t* went to the hospital?’  约翰：他 见 了 因为 发烧 进 了 医院 的 朋友。  ta jian le yinwei fashao jin le yiyuan de pengyou  he meet PERF because fever go PERF hospital REL friend  ‘He met the friend who went to the hospital because she had a fever.’ |
| 1. 布伦：小赵 表扬 了 为什么 参加 了 比赛 的 女孩？   Xiaozhao biaoyang le weishenme canjia le bisai de nvhai  Xiaozhao praise PERF why participate PERF competition REL girl  ‘Why did Xiaozhao praise the girl who *t* participated in the competition?’  莱恩：他 表扬 了 那 个 因为 想 证明 自己 而  Ta biaoyang le na ge yinwei xiang zhengming ziji er  he praise PERF that CL because want prove self do  参加 了 比赛 的 女孩。  canjia le bisai de nvhai  participate PERF competition REL girl  ‘He praised the girl who took part in the competition because she wanted to prove herself.’ |
| 1. 塞西：孙艺 举报 了 为什么 不 写 作业 的 同学？   Sunyi jubao le weishenme bu xie zuoye de tongxue  Sunyi report PERF why not write homework REL classmate  ‘Why did Sunyi report the classmate who *t* didn't finish his homework?  加勒：她 举报 了 那 个 因为 玩 游戏 不 写 作业 的 同学。  ta jubao le na ge yinwei wan youxi bu xie zuoye de tongxue  she report PERF that CL because play game not write homework REL classmate  ‘She reported the classmate who didn't finish his homework because he was playing games.’ |
| 1. 韦恩：志杰 联系 了 为什么 要 去 学校 的 同学？   Zhijie lianxi le weishenme yao qu xuexiao de tongxue  Zhijie contacct PERF why want go school REL classmate  ‘Why did Zhijie contact the classmate who *t* was going to school?’  艾希：他 联系 了 因为 要 参加 期末 考试 所以 要 去  ta lianxi le yinwei yao canjia qimo kaoshi suoyi yao qu  he contact PERF because need attend final exam so need go  学校 的 同学。  xuexiao de tongxue  school REL classmate  ‘He contacted the classmate who was going to school because of the final exam.’ |
| 1. 恩熙：张元 约 了 为什么 不 吃 火锅 的 女孩？   Zhangyuan yue le weishenme bu chi huoguo de nvhai  Zhangyuan date PERF why not eat hotpot REL girl  ‘Why did Zhangyuan date the girl who *t* did not eat hotpot?’  露露：她 约 了 因为 减肥 所以 不 吃 火锅 的 女孩。  ta yue le yinwei jianfei suoyi bu chi huoguo de tongxue  she date PERF because lose.weight so not eat hotpot REL girl  ‘She dated the classmate who did not eat hotpot because she was on a diet.’ |
| 1. 肖恩：小王 要 了 为什么 没 去 聚会 的 男孩 的 联系方式？   Xiaowang yao le weishenme mei qu juhui de nanhai de lianxifangshi  Xiaowang ask PERF why not go gathering REL boy REL TEL  ‘Why did Xiaowang asked for the contact details of the boy who *t* didn’t go to the gathering.’  萧艾：他要了那个因为家里有事所以没去聚会的男孩的联系方式。  ta yao le na ge yinwei jiali you shi suoyi mei qu juhui de  he ask PERF that CL because home have even so not go gathering REL  nanhai de lianxifangshi.  boy REL TEL  ‘He asked for the contact details of the boy who didn’t go the gathering because of family issues.’ |
| 1. 志豪：妈妈 批评 了 为什么 没有 帮忙 做 家务 的 孩子？   Mama piping le weishenme meiyou bangmang zuo jiawu de haizi  mom criticize PERF why not help do housework REL child  ‘Why did mom criticize the child who *t* didn't help with the housework?’  西西：妈妈 批评 了 因为 看 电视 所以 没有 帮忙  mama piping le yinwei kan dianshi suoyi meiyou bangmang  mom criticize PERF because watch TV so not help  做 家务 的 孩子。  zuo jiawu de haizi  do housework REL child  ‘Mom criticized the child who didn't help with the housework because of watching TV.’ |
| 1. 小芬：菲菲 打 了 为什么 偷 钱 的 女孩？   Feifei da le weishenme tou qian de nvhai  Feifei beat PERF why steal money REL girl  ‘Why did Feifei beat the girl who *t* stole money?  小天：她 打 了 因为 妒忌 别人 而 偷 钱 的 女孩。  ta da le yinwei duli bieren suoyi tou qian de nvhai  she beat PERF because envy other so steal money REL girl  ‘She beat the girl who stole money because of jealousy.’ |
| 1. 黛珂：萧艾 见 了 昨晚 为什么 没 回家 的 朋友？   Xiaoai jian le zuowan weishenme mei huijia de pengyou  Xiaoai meet PERF last.night why not go.home REL friend  ‘Why did Xiaoai meet the friend who *t* didn't go home last night?’  艾希：她 见 了 昨晚 因为 喝醉 了 所以 没 回家 的 朋友。  ta jian le zuowan yinwei hezui le suoyi mei huijia de pengyou  she meet PERF last.night because drunk PERF so not go.home REL friend  ‘She met the friend who didn't go home last night because he was drunk.’ |
| 1. 西奥：梓豪 见 了 为什么 要 喝酒 的 朋友？   Zihao jian le weishenm yao hejiu de pengyou  Zihao meet PERF why want drink REL friend  ‘Why did Zihao meet the friend who *t* wanted to have a drink?’  志夕：他 见 了 因为 失恋 所以 要 喝酒 的 朋友。  ta jian le yinwei shilian suoyi yao hejiu de pengyou  he meet PERF because break.up so want drink REL friend  ‘He met the friend who wanted to have a drink because he broke up with his girlfriend.’ |
| 1. 君君：小金 见 了 为什么 要 卖 房子 的 人？   Xiaojin jian le weishenm yao mai fangzi de ren  Xiaojin meet PERF why want sell house REL person  ‘Why did Xiaojin meet the person who *t* was selling his house?  辰辰：他 见 了 因为 还 不 起 钱 所以 要 卖掉 房子 的 人。  ta jian le yinwei huan bu qi qian suoyi yao maidiao fangzi de ren  he meet PERF because returen not afford money so want sell house REL person  ‘He met the person who was selling his house because he couldn't afford to return the money.’ |
| 1. 吉吉：梁秋 联系 了 为什么 要 搬家 的 女孩？   Liangqiu lianxi le weishenm yao banjia de nvhai  Liangqiu contact PERF why want move REL girl  ‘Why did Liangqiu contact the girl who *t* was going to move?  奇奇：她 联系 了 因为 工作 调动 所以 要 搬家 的 女孩。  ta lianxi le yinwei gongzuo diaodong suoyi yao banjia de nvhai  she contact PERF because work transfer so want move REL girl  ‘She contacted the girl who was moving because she was transferred to another job.’ |
| 1. 果果：英博 骂 了 为什么 把 门 拆 了 的 女孩？   Yingbo ma le weishenme ba men chai le de nvhai  Yingbo scold PERF why BA door tear.down PERF REL girl  ‘Why did Yingbo scolded the girl who *t* tore down the door?’  浩瀚：他 骂 了 因为 觉得 不 好看 就 把 门 拆 了 的 女孩。  ta ma le yinwei juede bu haokan jiu ba men chai le de nvhai  he scold PERF because think not beautiful just BA door tear.down PERF REL girl  ‘He scolded the girl who tore down the door just because she thought it not beautiful.’ |
| Condition H | 1. 露露：安娜 骂 了 为什么 逃课 的 学生？   Anna ma le weishenme taoke de xuesheng?  Anna scold PERF for.what skipp.class REL student  ‘For what purpose did Anna scold the student who *t* skipped the class?’  娜娜：她 骂 了 那 个 为了 玩 游戏 而 逃课 的 学生。  ta ma le na ge weile wan youxi er taoke de xuesheng  she scold PERF that CL in.order.to play game so skip.class REL student  ‘She scolded the student who skipped the class in order to play games.’ |
| 1. 亚瑟：俊杰 早上 见 了 为什么 辞职 的 员工？   Junjie zaoshang jian le weishenme cizhi de yuangong  Junjie morning meet PERF for.what resign REL staff  ‘For what purpose did Junjie meet the staff who *t* had resigned this morning?’  佩琳：他 见 了 那 个 为了 照顾 小孩 辞职 了 的 员工。  ta jian le na ge weile zhaogu xiaohai cizhi le de yuangong  he meet PERF that CL in.order.to look.after children resign PERF REL staff  ‘He met the staff who resigned in order to look after his children.’ |
| 1. 艾诺：刘颖 见 了 为什么 说谎 的 同学？   Liuying jian le weishenme shuohuang de tongxue  Liuying meet PERF for.what lie REL classmate  ‘For what purpose did Liuying meet the classmate who *t* told a lie?’  罗宾：她 见 了 那 个 为了 逃避 惩罚 而 说谎 了 的 同学。  ta jian le na ge weile taobi chengfa er shuohuang le de tongxue  she meet PERF that CL in.order.to avoid punish so tell.a.lie PERF REL classmate  ‘She met the classmate who lied in order to avoid being punished.’ |
| 1. 朱利：志安 见 了 为什么 进 了 医院 的 朋友？   Zhian jian le weishenme jin le yiyuan de pengyou  Zhian meet Perf for.what go PERF hospital REL friend  ‘For what purpose did Zhian meet the friend who *t* went to the hospital?’  劳伦：他 见 了 为了 治疗 发烧 进 了 医院 的 朋友。  ta jian le weile zhiliao fashao qu le yiyuan de pengyou  she meet PERF in.order.to treat fever go PERF hospital REL friend  ‘She met the friend who went to the hospital in order to get some treatment.’ |
| 1. 亚伯：小赵 表扬 了 为什么 参加 了 比赛 的 女孩？   Xiaozhao biaoyang le weishenme canjia le bisai de nvhai  Xiaozhao praise PERF for.what participate PERF competition REL girl  ‘For what purpose did Xiaozhao praise the girl who *t* partticipated in the competition?’  亚当：他表扬 了 那 个 为了 证明 自己 而 参加 了 比赛 的 女孩。  ta biaoyang le na ge weile zhengming ziji canjia le bisai de nvhai  he praise PERF that CL in.order.to prove self participate PERF competition DEL girl  ‘He prasied the girl who took part in the competition in order to prove herself.’ |
| 1. 丹尼：孙艺 举报 了 为什么 不 写 作业 的 同学？   Sunyi jubao le weishenme bu xie zuoye de tongxue  Sunyi report PERF for.what not write homework REL classmate  ‘For what purpose did Sunyi report the classmate who *t* didn't finish his homework?  大卫：她 举报 了 那 个 为了 偷懒 不 写 作业 的 同学。  ta jubao le na ge weile toulan bu xie zuoye de tongxue  she report PERF that CL in.order.to mike not write homework REL classmate  ‘She reported the classmate who didn't do his homework in order to mike. |
| 1. 艾达：志杰 联系 了 为什么 要 去 学校 的 同学？   Zhijie lianxi le weishenme yao qu xuexiao de tongxue  Zhijie contacct PERF for.what want go school REL classmate  ‘For what purpose did Zhijie contact the classmate who *t* was going to school?’  安琪：他 联系 了 为了 写 论文 所以 要 去 学校 的 同学。  ta lianxi le weile xie lunwen suoyi yao qu xuexiao de tongxue  he contact PERF in.order.to write thesis so need go school REL classmate  ‘He contacted the classmate who was going to school in order to work on her thesis.’ |
| 1. 达利：张元 约 了 为什么 不 吃 火锅 的 女孩？   Zhangyuan yue le weishenme bu chi huoguo de nvhai  Zhangyuan date PERF for.what not eat hotpot REL girl  ‘For what purpose did Zhangyuan date the girl who *t* did not eat hotpot?’  琪琪：她 约 了 为了 减肥 不 吃 火锅 的 女孩。  ta yue le weile jianfei bu chi huoguo de nvhai  she date PERF in.order.to lose.weight not eat hotpot REL girl  ‘She dated the classmate who did not eat hotpot in order to lose weight.’ |
| 1. 孝利：小王 要 了 为什么 没 去 聚会 的 男孩 的 联系方式？   Xiaowang yao le weishenme mei qu juhui de nanhai de lianxifangshi  Xiaowang ask PERF for.what not go gathering REL boy REL TEL  ‘For what purpose did Xiaowang asked for the contact details of the boy who *t* didn’t go to the  gathering.’  小安：他要了为了早点写完论文所以没去聚会的男孩的联系方式。  ta yao le weile zaodian xie wan lunwen suoyi mei qu juhui de  he ask PERF in.order.to earlier write finish thesis so not go gathering REL  nanhai de lianxifangshi  boy REL TEL  ‘He asked for the contact details of the boy who didn’t go to the gathering in order to finish his  thesis earlier. |
| 1. 艾达：妈妈 批评 了 为什么 没有 帮忙 做 家务 的 孩子？   Mama piping le weishenme meiyou bangmang zuo jiawu de haizi  mom criticize PERF for.what not help do housework REL child  ‘For what purpose did mom criticize the child who *t* didn't help with the housework?’  安琪：妈妈 批评 了 为了 看 电视 没有 帮忙 做 家务 的 孩子。  Mama piping le weile kan dianshi meiyou bangmang zuo jiawu de haizi  mom criticize PERF in.order.to watch Tv not help do housework REL child  ‘She criticized the child who didn't help with the housework in order to watch TV.’ |
| 1. 艾达：菲菲 打 了 为什么 偷 钱 的 女孩？   Feifei da le weishenme tou qian de nvhai  Feifei beat PERF for.what steal money REL girl  ‘For what purpose did Feifei beat the girl who *t* stole money?  小晶：她 打 了 为了 整容 而 偷 钱 的 女孩。  ta da le weile zhengrong er tou qian de nvhai  she beat PERF in.order.to cosmetic.surgery so steal money REL girl  ‘She beat the girl who stole money in order to receive cosmetic surgery.’ |
| 1. 小达：萧艾 见 了 昨晚 为什么 没 回家 的 朋友？   Xiaoai jian le zuowan weishenme mei huijia de pengyou  Xiaoai meet PERF last.night for.what not go.home REL friend  ‘For what purpose did Xiaoai meet the friend who *t* didn't go home last night?’  晓乐：她 见 了 昨晚 为了 加班 赶 报表 没 回家 的 朋友。  ta jian le zuowan weile jiaban gan baobiao mei huijia de pengyou  she meet PERF last.night in.order.to overtime do report not go.home REL friend  ‘She met the friend who didn't go home in order to work overtime to finish the report.’ |
| 1. 晴儿：梓豪 见 了 为什么 要 喝酒 的 朋友？   Zihao jian le weishenm yao hejiu de pengyou  Zihao meet PERF for.what want drink REL friend  ‘For what purpose did Zihao meet the friend who *t* want to have a drink?’  永琪：他 见 了 为了 庆祝 生日 所以 要 喝酒 的 朋友。  ta jian le weile qingzhu shengri suoyi yao hejiu de pengyou  he meet PERF in.order.to celebrate birthday so want drink REL friend  ‘He met the friend who wanted to have a drink in order to celebrate his birthday. |
| 1. 平平：小金 见 了 为什么 要 卖 房子 的 人？   Xiaojin jian le weishenm yao mai fangzi de ren  Xiaojin meet PERF for.what want sell house REL person  ‘For what purpose did Xiaojin meet the person who *t* is selling his house?  安安：他 见 了 为了 还 钱 所以 要 卖掉 房子 的 人。  ta jian le weile huan qian suoyi yao maidiao fangzi de ren  he meet PERF in.order.to return money so want sell house REL person  ‘He met the person who was selling his house in order to return the money.’ |
| 1. 子彦：梁秋 联系 了 为什么 要 搬家 的 女孩？   Liangqiu lianxi le weishenm yao banjia de nvhai  Liangqiu contact PERF for.what want move REL girl  ‘For what purpose did Liangqiu contact the girl who *t* was going to move?  俊逸：她 联系 了 为了 摆脱 前男友 的 纠缠 所以要 搬家 的 女孩。  ta lianxi le weile baituo qiannanyou de jiuchan suoyi yao banjia de nvhai  she contact PERF in.order.to get.rid.of ex.boyfriend REL tangle so want move REL girl |
| 1. 佳佳：英博 骂 了 为什么 把 门 拆 了 的 女孩？   Yingbo ma le weishenme ba men chai le de nvhai  Yingbo scold PERF for.what BA door tear.down PERF REL girl  ‘For what purpose did Yingbo scolded the girl who *t* tore down the door?’  康康：他 骂 了 为了 一时 好玩 就 把 门 拆 了 的 女孩。  ta ma le weile yishi haowan jiu ba men chai le de nvhai  he scold PERF in.order.to a.momenr have.fun just BA door tear.down PERF REL girl  ‘He scolded the girl who tore down the door in order to have fun for a moment.’ |
| Condition I | 1. 莱纳：安娜 为了什么 说 李明 逃课 了?   Anna weileshenme shuo Liming taoke le  Anna for.what say Liming skip.class PERF  ‘For what purpose did Anna *t* say that Liming skipped the class?’  朱茵：为了 破坏 李明 的 名声。  weile pohuai Liming de mingsheng  in.order.to destroy Liming DEL reputation  ‘In order to destroy Liming’s reputation.’ |
| 1. 英杰：俊杰 为了什么 说 李洋 辞职 了?   Junjie weileshenme shuo Liyang cizhi le  Junjie for.what say Liyang resign PERF  ‘For what purpose did Junjie *t* say that Liyang had resigned?’  佳杰：为了 引起 同事 们 的 注意。  weile yinqi tongshi men de zhuyi  in.order.to arise colleague PLU DEL attention  ‘In order to arise the colleagues’ attention.’ |
| 1. 博超：刘颖 为了什么 说 陈安 说谎 了?   Liuying weileshenme shuo Chenan shuohuang le  Liuying for.what say Chenan tell.a.lie  ‘For what purpose did Liuying *t* say that Chenan had told a lie?’  文亚：为了 误导 大众。  weile wudao dazhong  in.order.to mislead public  ‘In order to mislead the public.’ |
| 1. 赛芬：志安 为了什么 说 成杰 去 医院 了?   Zhian weileshenme shuo Chengjie qu yiyuan le  Zhian for.what say Chengjie go hospital  ‘For what purpose did Zhian *t* say that Chengjie went to the hospital?’  艾达：为了 散播 谣言。  weile sanbo yaoyan  in.order.to spread rumor  ‘In order to spread the rumor.’ |
| 1. 马克：小赵 为了什么 说 美美 参加 了 比赛?   Xiaozhao weileshenme shuo Meimei canjia le bisai  Xiaozhao for.what say Meimei participate PERF competition  ‘For what purpose did Xiaozhao *t* say that Meimei participated in the competition?’  马伦：为了 鼓励 其他 同学。  weile guli qita tongxue  in.order.to encourage other student  ‘In order to encourage other students.’ |
| 1. 布兰：孙艺 为了什么 举报 杰豪 不 写 作业?   Sunyi weileshenme jubao Jiehao bu xie zuoye  Sunyi for.what report Jiehao not write homework  ‘For what purpose did Sunyi *t* report that Jiehao did not do his homework?’  兰特：为了 得到 老师 的 表扬。  weile dedao laoshi de biaoyang  in.order.to get teacher DEL praise  ‘In order to get the teacher’s praise.’ |
| 1. 菲比：志杰 为了什么 说 清雅 去 学校 了?   Zhijie weileshenme shuo Qingya qu xuexiao le  Zhijie for.what say Qingya go school PERF  ‘For what purpose did Zhijie *t* say that Qingya went to school?’  路易：为了 让 妈妈 放心。  weile rang mama fangxin  in.order.to let mom relieve  ‘In order to reassure mom.’ |
| 1. 梦露：张元 为了什么 说 李冰 不 吃 火锅？   Zhangyuan weileshenme shuo Libing bu chi huoguo  Zhangyuan for.what say Libing not eat hotpot  ‘For what purpose did Zhangyuan *t* say that Libing did not eat hotpot?’  李晓：为了 去 她自己 想 去 的 餐厅。  weile qu taziji xiang qu de canting  in.order.to go herself want go DEL restaurant  ‘In order to go to the restaurant she wanted to go.’ |
| 1. 小金：小王 为什么 说 小琪 没 去 聚会?   Xiaowang weishenme shuo Xiaoqi mei qu juhui  Xiaowang for.what say Xiaoqi not go gathering  ‘For what purpose did Xiaowang *t* say that Xiaoqi did not go to the gathering?’  鲁平：为了 保护 小琪。  weile baohu Xiaoqi  in.order.to protect Xiaoqi  ‘In order to pretect Xiaoqi.’ |
| 1. 小菲：娜娜 为什么 说 颖儿 没有 帮忙 做 家务？   Nana weishenme shuo Yinger meiyou bangmang zuo jiawu  Nana for.what say Yinger not help do housework  ‘For what purpose did Nana *t* say that Yinger did not help with the housework?’  小卢：为了 让 妈妈 批评 颖儿。  weile rang mama piping Yinger  in.order.to let mom criticize Yinger  ‘In order to let mom criticize Yinger.’ |
| 1. 菲比：菲菲 为什么 诬陷 莉莉 偷 钱 了?   Feifei weishenme wuxian Lili tou qian le  Feifei for.what frame Lili steal money PERF  ‘For what purpose did Feifei *t* frame Lili for stealing money?’  伊蓉：为了 让 朋友 们 都 讨厌 她。  weile rang pengyou men dou taoyan ta  in.order.to let friend PLU all hate her  ‘In order to make all her friends hate her.’ |
| 1. 小文：萧艾 为什么 说 邓伦 昨晚 没 回家？   Xiaoai weishenme shuo Denglun zuowan mei huijia  Xiaoai for.what say Denglun last.night not go.home  ‘For what purpose did Xiaoai *t* say that Denglun did not go home last night?’  小水：为了 引起 他 女朋友 的 怀疑。  weile yinqi ta nvpengyou de huaiyi  in.order.to arise his girlfriend DEL suspicion  ‘In order to arise his firlfriend’s suspicion.’ |
| 1. 晓芬：梓豪 为什么 说 小贞 喝酒 了？   Zihao weishenme shuo Xiaozhen hejiu le  Zihao for.what say Xiaozhen drink PERF  ‘For what purpose did Zihao *t* say that Xiaozhen drank?’  小萍：为了 把 事故 归咎 于 她。  weile ba shigu guijiu yu ta  in.order.to BA accident blame to her  ‘In order to blame him for the accident.’ |
| 1. 楠楠：小金 为什么 说 小朱 已经 卖掉 房子 了？   Xiaojin weishenme shuo Xiaozhu yijing maidiao fangzi le  Xiaojin for.what say Xiaozhu already sell house PERF  ‘For what purpose did Xiaojin *t* say that Xiaozhu had sold her house?’  静宜：为了 博得 大家 的 同情。  weile bode dajia de tongqing  in.order.to win everyone DEL sympathy  ‘In order to win everyone’s sympathy.’ |
| 1. 菲比：梁秋 为什么 说 子文 已经 搬家 了？   Liangqiu weishenme shuo Ziwen yijing banjia le  Liangqiu for.what say Ziwen already move PERF  ‘For what purpose did Liangqiu *t* say that Ziwen had already moved?’  小燕：为了 让 她 前男友 别 再 纠缠 她。  weile rang ta qiannanyou bie zai jiuchan ta  in.order.to let her ex.boyfriend not again tangle her  ‘In order to make her ex-boyfriend stop tangling her.’ |
| 1. 菲尔：英博 为什么 说 琪琪 把 门 拆 了？   Yingbo weishenme shuo Qiqi ba men chai le  Yingbo for.what say Qiqi BA door tear.down PERF  ‘For what purpose did Yingbo *t* say that Qiqi tore down the door?’  依依：为了 推卸 责任。  weile tuixie zeren  in.order.to shirk responsibility  ‘In order to shirk the responsibility.’ |
| Condition J | 1. 提芬：安娜 说 李明 为了什么 逃课 了？   Anna shuo Liming weileshenme taoke le  Anna say Liming for.what skip.class PERF  ‘For what purpose did Anna say that Liming *t* skipped the class?’  玛丽：她 说 李明 为了 玩 游戏 逃课 了。  ta shuo Liming weile wan youxi taoke le  she say Liming in.order.to play game skip.class PERF  ‘She said that Liming skipped the class in order to play games.’ |
| 1. 杰伟：俊杰 说 李洋 为了什么 辞职 了？   Junjie shuo Liyang weileshenme cizhi le  Junjie say Liyang for.what resign PERF  ‘For what purpose did Junjie say Liyang *t* had resigned?’  卢杰：他 说 李洋 为了 照顾 小孩 辞职 了。  ta shuo Liyang weile zhaogu xiaohai cizhi le  he say Liyang in.order.to look.after children resign PERF  ‘He said that Liyang resigned in order to look after his children.’ |
| 1. 艾德：刘颖 说 陈安 为了什么 说谎 了？   Liuying shuo Chenan weileshenme shuohuang le  Liuying say Chenan for.what tell.a.lie PERF  ‘For what purpose did Liuying say that Chenan *t* had told a lie?’  艾伦：她 说 陈安 为了 不 被 惩罚 所以 说谎 了。  ta shuo Chenan weile bu bei chengfa suoyi shuohuang le  she say Chenan in.order.to not be punished so tell.a.lie PERF  ‘She said that Chenan told a lie in order not to be punished.’ |
| 1. 亨利：志安 说 成杰 为了什么 去 医院 了？   Zhian shuo Chengjie weileshenme qu yiyuan le  Zhian say Chengjie for.what go hospital PERF  ‘For what purpose did Zhian say that Chengjie *t* went to the hospital?’  海勒：他 说 成杰 为了 探望 朋友 所以 去 医院 了。  Ta shuo Chengjie weile tanwang pengyou suoyi qu yiyuan le  she say Chengjie in.order.to visit friend so go hospital PERF  ‘She said that Chengjie went to the hospital in order to visit his friend.’ |
| 1. 马文：小赵 说 美美 为了什么 参加 了 比赛？   Xiaozhao shuo Meimei weileshenme canjia le bisai  Xiaozhao say Meimei for.what participate PERF competition  ‘For what purpose did Xiaozhao say that Meimei *t* participated in the comprtiotion?’  马特：他 说 美美 为了 证明 自己 所以 参加 了 比赛。  Ta shuo Meimei weile zhengming ziji suoyi canjia le bisai  he say Meimei in.order.to prove self so participate PERF competition  ‘He said that Meimei participated in the competition in order to prove herself.’ |
| 1. 刘震：孙艺 举报 杰豪 为了什么 不 写 作业？   Sunyi jubao Jiehao weileshenme bu xie zuoye  Sunyi report Jiehao for.what not write homework  ‘For what purpose did Sunyi report Jiehao *t* didn’t do his homework?’  埃文：她 举报 杰豪 为了 偷懒 不 写 作业。  Ta juebao Jiehao weile toulan bu xie zuoye  she report Jiehao in.order.to mike not write homework  ‘She reported that Jiehao didn't do his homework in order to mike.’ |
| 1. 里奇：志杰 说 清雅 为了什么 去 学校 了？   Zhijie shuo Qingya weileshenme qu xuexiao le  Zhijie say Qingya for.what go school PERF  ‘For what purpose did Zhijie say that Qingya *t* went to school?’  佛农：他 说 清雅 为了 写 论文 去 了 学校。  ta shuo Qianya weile xie lunwen qu le xuexiao  he say Qianya in.order.to write thesis go PERF school  ‘He said that Qianya went to school in order to work on her thesis.’ |
| 1. 静姝：张元 说 李冰 为了什么 不 吃 火锅？   Zhangyuan shuo Libing weileshenme bu chi huoguo  Zhangyuan say Libing for.what not eat hotpot  ‘For what purpose did Zhangyuan say that Libing *t* didn’t eat hotpot.’  心心：他 说 李冰 为了 减肥 不 吃 火锅。  ta shuo Libing weile jianfei bu chi huoguo  he say Libing in.order.to lose.weight not eat hotpot  ‘He said that Libing did not eat hotpot in order to lose weight.’ |
| 1. 小丽：小王 说 小琪 为了什么 没 去 聚会？   Xiaowang shuo Xiaoqi weileshenme mei qu juhui  Xiaowang say Xiaoqi for.what not go gathering  ‘For what purpose did Xiaowang say that Xiaoqi *t* didn’t go to the gathering?’  小农：他 说 小琪 为了 早点 写 完 作业 所以 没 去 聚会。  ta shuo Xiaoqi weile zaodian xie wan zuoye suoyi mei qu juhui  he say Xiaoqi in.order.to early write finish homework so not go gathering |
| 1. 小柯：娜娜 说 颖儿 为了什么 没有 帮忙 做 家务？   Nana shuo Yinger weileshenme meiyou bangmang zuo jiawu  Nana say Yinger for.what not help do housework  ‘For what purpose did Nana say that Yinger *t* didn’t help with the housework?’  小佛：她 说 颖儿 为了 看 电视 没有 帮忙 做 家务。  ta shuo Yinger weile kan dianshi meiyou bangmang zuo jiawu  she say Yinger in.order.to watch TV not help do housework  ‘She said that Yinger didn't help with the housework in order to watch TV.’ |
| 1. 里奇：菲菲 诬陷 莉莉 为le 什么 偷 钱 了？   Feifei wuxian Lili weileshenme tou qian le?  Feifei frame Lili for.what steal money PERF  ‘For what purpose did Feifei frame Lili *t* for stealing money?’  小景：她 诬陷 莉莉 为了 整容 偷 钱 了。  ta wuxian Lili weile zhengrong tou qian le  she frame Lili in.order.to cosmetic surgery steal money Pref  ‘She framed Lili for stealing money in order to receive cosmetic surgery.’ |
| 1. 小朵：萧艾 说 邓伦 昨晚 为了什么 没 回家？   Xiaoai shuo Denglun zuowan weilesheme mei huijia  Xiaoai say Denglun last.night for.what not go.home  ‘For what purpose did Xiaoai say that Denglun *t* didn’t go home last night?’  佛农：她 说 邓伦 为了 加班 赶 报表 所以 没 回家。  ta shuo Denglun weile jiaban gan baobiao suoyi mei huijia  she say Denglun in.order.to overtime do report so not back.home  ‘She said that Denglun didn't go home in order to work overtime to finish the report.’ |
| 1. 马原：梓豪 说 小贞 为了什么 喝酒 了？   Zihao shuo Xiaozhen weileshenme hejiu le  Zihao say Xiaozhen for.what drink PERF  ‘For what purpose did Zihao say that Xiaozhen *t* drank alcohol?’  志明：他 说 小贞 为了 庆祝 生日 所以 喝酒 了。  ta shuo Xiaozhen weile qingzhu shengri suoyi hejiu le  he say Xiaozhen in.order.to celebrate birthday so drink PERF  ‘He said that Xiaozhen drank in order to celebrate his birthday.’ |
| 1. 里奇：小金 说 小朱 为了什么 已经 卖掉 了 房子 了？   Xiaojin shuo Xiaozhu weileshenme yijing maidiao le fangzi le  Xiaojin say Xiaozhu for.what already sell PERF house PERF  ‘For what purpose did Xiaojin say Xiaozhu *t* had sold her house?’  陈毅：他 说 小朱 为了 给 妈妈 治病 已经 卖掉了 房子 了。  ta shuo Xiaozhu weile gei mama zhibing yijing maidiao fangzi le  he say Xiaozhu in.order.to give mom cure already sell house PERF  ‘He said that Xiaozhu had sold his house in order to get his mom cured.’ |
| 1. 马艳：梁秋 说 子文 为了什么 已经 搬家 了？   Liangqiu shuo Ziwen weileshenme yijing banjia le?  Liangqiu say Ziwen for.what already move PERF  ‘For what purpose did Liangqiu say that Ziwen *t* had moved?’  加峰：她 说 子文 为了 摆脱 前男友 的 纠缠 已经 搬家 了。  ta shuo Ziwen weile baituo qiannanyou de jiuchan yijing banjia le  she say Ziwen in.order.to get.rid.of ex-boyfriend REL tangle already move PERF  ‘She said that Ziwen had already move in order to get rid of the entanglement of her ex-  boyfriend. |
| 1. 皑皑：英博 说 琪琪 为了什么 把 门 拆 了？   Yingbo shuo Qiqi weileshenme ba men chai le?  Yingbo say Qiqi why BA door tear PERF  ‘Why did Yingbo say that Qiqi *t* tore down the door?’  冰冰：他 说 琪琪 为了 让 房间 看起来 大 一点 所以 把 门 拆 了。  ta shuo Qiqi weile rang fangjian kanqilai da yidian suoyi ba men chai le  he say Qiqi in.order.to let room look big little so BA door tear.down PERF  ‘He said that Qiqi tore down the door in order to make the room look a bit bigger.’ |
| Condition K | 1. 李青：安娜 为了什么 骂 了 逃课 的 学生？   Anna weileshenme ma le taoke de xuesheng  Anna for.what scold PERF skipp.class REL student  ‘For what purpose did Anna *t* scold the student who skipped the class?’  小莹：为了 教育 他。  weile jioayu ta  in.order.to educate him  ‘In order to educate him.’ |
| 1. 雅芙：俊杰 早上 为了什么 见 了 辞职 的 员工？   Junjie zaoshang weileshenme jian le cizhi de yuangong  Junjie morning for.what meet PERF resign REL staff  ‘For what purpose did Junjie *t* meet the staff who had resigned this morning?’  婉婷：为了 完成 工作 交接。  weile wancheng gongzuo jiaojie  in.order.to complete work transfer  ‘In order to complete the work transfer.’ |
| 1. 伊莱：刘颖 为了什么 见 了 说谎 的 同学？   Liuying weileshenme jian le shuohuang de tongxue  Liuying for.what meet PERF tell.a.lie REL classmate  ‘For what purpose did Liuying *t* meet the classmate who told a lie?’  爱丽：为了 找出 真相。  weile zhaochu zhenxiang  in.order.to find.out truth  ‘In order to find out the truth.’ |
| 1. 伊恩：志安 为了什么 见 了 进 了 医院 的 朋友？   Zhian weileshenme jian le jin le yiyuan de pengyou  Zhian for.what meet PERF go PERF hospital REL friend  ‘For what purpose did Zhian *t* meet the friend who went to the hospital?’  艾凡：为了 看看 他 好 点 了 没。  weile kankan ta hao dian le mei  in.order.to see him well some PERF not  ‘In order to see whether he was feeling better or not.’ |
| 1. 纽曼：小赵 为了什么 表扬 了 参加 了 比赛 的 女孩？   Xiaozhao weileshenme biaoyang le canjia le bisai de nvhai  Xiaozhao for.what praise PERF participate PERF competition REL girl  ‘For what purpose did Xiaozhao *t* praise the girl who participated in the competition?’  亚纶：为了 鼓励 她 继续 努力。  weile guli ta jixu nuli  in.order.to encourage her continue try  ‘In order to encourage her to keep trying.’ |
| 1. 格林：孙艺 为了什么 举报 了 不 写 作业 的 同学？   Sunyi weileshenme jubao le bu xie zuoye de tongxue  Sunyi or.what report PERF not write homework REL classmate  ‘For what purpose did Sunyi *t* report the classmate who didn't do his homework?’  克里：为了 得到 老师 的 表扬。  weile dedao laoshi de biaoyang  in.order.to get teacher REL praise  ‘In order to get the teacher's praise.’ |
| 1. 维克：志杰 为了什么 联系 了 要 去 学校 的 同学？   Zhijie weileshenme lianxi le yao qu xuexiao de tongxue  Zhijie for.what contact PERF want go school REL classmate  ‘For what purpose did Zhijie *t* contact the classmate who was going to school?’  扎克：为了 和 她 一起 去。  weile he ta yiqi qu  in.order.to with him together go  ‘In order to go with him.’ |
| 1. 克里：张元 为了什么 约 了 不 吃 火锅 的 女孩？   Zhangyuan weileshenme yue le bu chi huoguo de nvhai  Zhangyuan for.what date PERF not eat hotpot REL girl  ‘For what purpose did Zhangyuan *t* date the girl who did not eat hotpot?’  里昂：为了 和 她 交 朋友。  weile he ta jiao pengyou  in.order.to with her make friend  ‘In order to make friends with her.’ |
| 1. 小伟：小王 为了什么 要 了 没 去 聚会 的 男孩 的 联系方式？   Xiaowang weileshenme yao le mei qu juhui de nanhai de lianxifangshi  Xiaowang for.what ask PERF not go gathering REL boy REL TEL  ‘For what purpose did Xiaowang *t* asked for the contact details of the boy who didn’t go to the  gathering.’  小可：为了 邀请 他 下次 一起 去。  weile yaoqing ta xiaci yiqi qu  in.order.to invite him next.time together go  ‘In order to invite him to go together next time.’ |
| 1. 晓伟：妈妈 为了什么 批评 了 没有 帮忙 做 家务 的 孩子？   Mama weileshenme piping le meiyou bangmang zuo jiawu de haizi  mom for.what criticize PERF not help do housework REL child  ‘For what purpose did mom *t* criticize the child who didn't help with the housework?’  小扎：为了 培养 孩子 的 责任心。  weile peiyang haizi de zerenxin  in.order.to develop child REL responsibility  ‘In order to develop her children's responsibility.’ |
| 1. 小九：菲菲 为了什么 打 了 偷 钱 的 女孩？   Feifei weileshenme da le tou qian de nvhai  Feifei for.what beat PERF steal money REL girl  ‘For what purpose did Feifei *t* beat the girl who stole money?’  小莫：为了 让 她 不 再 犯 错。  weile rang ta bu zai fan cuo  in.order.to let her no again make mistake  ‘In order to let her not make the mistake again.’ |
| 1. 小珂：萧艾 为了什么 见 了 昨晚 没 回家 的 朋友？   Xiaoai weileshenme jian le zuowan mei huijia de pengyou  Xiaoai for.what meet PERF last.night not go.home REL friend  ‘For what purpose did Xiaoai *t* meet the friend who didn't go home last night?’  曼丽：为了 确认 他 是 否 还 好。  weile queren ta shi fou hai hao  in.order.to comfirm he is not still well  ‘In order to make sure whether he is fine.’ |
| 1. 小伟：梓豪 为了什么 见 了 要 喝酒 的 朋友？   Zihao weileshenme jian le want hejiu de pengyou  Zihao for.what meet PERF want drink REL friend  ‘For what purpose did Zihao *t* meet the friend who was going to have a drink.’  小沫：为了 和 他 一起 喝。  weile he ta yiqi he  in.order.to with him together drink  ‘In order to drink with him.’ |
| 1. 子俊：小金 为了什么 见 了 要 卖 房子 的 人？   Xiaojin weileshenme jian le yao mai fangzi de ren  Xiaojin for.what meet PERF want sell house REL person  ‘For what purpose did Xiaojin *t* meet the people who was selling his house?  珍安：为了 当面 确认 一下。  weile dangmian queren yixia  in.order.to in.person comfirm once  ‘In order to confirm in person.’ |
| 1. 晓芬：梁秋 为了什么 联系 了 要 搬家 的 女孩？   Liangqiu weileshenme lianxi le yao banjia de nvhai  Liangqiu for.what contact PERF want move REL girl  ‘For what purpose did Liangqiu *t* contact the girl who was going to move?’  曼曼：为了 提供 帮助。  weile tigong bangzhu  in.order.to offer help  ‘In order to offer help.’ |
| 1. 小娥：英博 为了什么 骂 了 把 门 拆 了 的 女孩？   Yingbo weileshenme ma le ba men chai le de nvhai  Yingbo why scold PERF BA door tear.down PERF REL girl  ‘Why did Yingbo *t* scolded the girl who tore down the door?’  芬芳：为了 让 她 意识到 自己 的 错误。  Weile rang ta yishidao ziji de cuowu  in.order.to let her know self REL mistake  ‘In order to let her realize her mistake.’ |
| Condition L | 1. 露露：安娜 骂 了 为了什么 逃课 的 学生？   Anna ma le weileshenme taoke de xuesheng?  Anna scold PERF for.what skipp.class REL student  ‘For what purpose did Anna scold the student who *t* skipped the class?’  娜娜：她 骂 了 那 个 为了 玩 游戏 而 逃课 的 学生。  ta ma le na ge weile wan youxi er taoke de xuesheng  she scold PERF that CL in.order.to play game so skip.class REL student  ‘She scolded the student who skipped the class in order to play games.’ |
|  | 1. 亚瑟：俊杰 早上 见 了 为了什么 辞职 的 员工？   Junjie zaoshang jian le weileshenme cizhi de yuangong  Junjie morning meet PERF for.what resign REL staff  ‘For what purpose did Junjie meet the staff who *t* had resigned this morning?’  佩琳：他 见 了 那 个 为了 照顾 小孩 辞职 了 的 员工。  ta jian le na ge weile zhaogu xiaohai cizhi le de yuangong  he meet PERF that CL in.order.to look.after children resign PERF REL staff  ‘He met the staff who resigned in order to look after his children.’ |
|  | 1. 艾诺：刘颖 见 了 为了什么 说谎 的 同学？   Liuying jian le weileshenme shuohuang de tongxue  Liuying meet PERF for.what lie REL classmate  ‘For what purpose did Liuying meet the classmate who *t* told a lie?’  罗宾：她 见 了 那 个 为了 逃避 惩罚 而 说谎 了 的 同学。  ta jian le na ge weile taobi chengfa er shuohuang le de tongxue  she meet PERF that CL in.order.to avoid punish so tell.a.lie PERF REL classmate  ‘She met the classmate who lied in order to avoid being punished.’ |
|  | 1. 朱利：志安 见 了 为了什么 进 了 医院 的 朋友？   Zhian jian le weileshenme jin le yiyuan de pengyou  Zhian meet Perf for.what go PERF hospital REL friend  ‘For what purpose did Zhian meet the friend who *t* went to the hospital?’  劳伦：他 见 了 为了 治疗 发烧 进 了 医院 的 朋友。  ta jian le weile zhiliao fashao qu le yiyuan de pengyou  she meet PERF in.order.to treat fever go PERF hospital REL friend  ‘She met the friend who went to the hospital in order to get some treatment.’ |
|  | 1. 亚伯：小赵 表扬 了 为了什么 参加 了 比赛 的 女孩？   Xiaozhao biaoyang le weileshenme canjia le bisai de nvhai  Xiaozhao praise PERF for.what participate PERF competition REL girl  ‘For what purpose did Xiaozhao praise the girl who *t* partticipated in the competition?’  亚当：他表扬 了 那 个 为了 证明 自己 而 参加 了 比赛 的 女孩。  ta biaoyang le na ge weile zhengming ziji canjia le bisai de nvhai  he praise PERF that CL in.order.to prove self participate PERF competition DEL girl  ‘He prasied the girl who took part in the competition in order to prove herself.’ |
|  | 1. 丹尼：孙艺 举报 了 为了什么 不 写 作业 的 同学？   Sunyi jubao le weileshenme bu xie zuoye de tongxue  Sunyi report PERF for.what not write homework REL classmate  ‘For what purpose did Sunyi report the classmate who *t* didn't finish his homework?  大卫：她 举报 了 那 个 为了 偷懒 不 写 作业 的 同学。  ta jubao le na ge weile toulan bu xie zuoye de tongxue  she report PERF that CL in.order.to mike not write homework REL classmate  ‘She reported the classmate who didn't do his homework in order to mike. |
|  | 1. 艾达：志杰 联系 了 为了什么 要 去 学校 的 同学？   Zhijie lianxi le weileshenme yao qu xuexiao de tongxue  Zhijie contacct PERF for.what want go school REL classmate  ‘For what purpose did Zhijie contact the classmate who *t* was going to school?’  安琪：他 联系 了 为了 写 论文 所以 要 去 学校 的 同学。  ta lianxi le weile xie lunwen suoyi yao qu xuexiao de tongxue  he contact PERF in.order.to write thesis so need go school REL classmate  ‘He contacted the classmate who was going to school in order to work on her thesis.’ |
|  | 1. 达利：张元 约 了 为了什么 不 吃 火锅 的 女孩？   Zhangyuan yue le weileshenme bu chi huoguo de nvhai  Zhangyuan date PERF for.what not eat hotpot REL girl  ‘For what purpose did Zhangyuan date the girl who *t* did not eat hotpot?’  琪琪：她 约 了 为了 减肥 不 吃 火锅 的 女孩。  ta yue le weile jianfei bu chi huoguo de nvhai  she date PERF in.order.to lose.weight not eat hotpot REL girl  ‘She dated the classmate who did not eat hotpot in order to lose weight.’ |
|  | 1. 孝利：小王 要 了 为了什么 没 去 聚会 的 男孩 的 联系方式？   Xiaowang yao le weileshenme mei qu juhui de nanhai de lianxifangshi  Xiaowang ask PERF for.what not go gathering REL boy REL TEL  ‘For what purpose did Xiaowang asked for the contact details of the boy who *t* didn’t go to the  gathering.’  小安：他要了为了早点写完论文所以没去聚会的男孩的联系方式。  ta yao le weile zaodian xie wan lunwen suoyi mei qu juhui de  he ask PERF in.order.to earlier write finish thesis so not go gathering REL  nanhai de lianxifangshi  boy REL TEL  ‘He asked for the contact details of the boy who didn’t go to the gathering in order to finish his  thesis earlier. |
|  | 1. 艾达：妈妈 批评 了 为了什么 没有 帮忙 做 家务 的 孩子？   Mama piping le weileshenme meiyou bangmang zuo jiawu de haizi  mom criticize PERF for.what not help do housework REL child  ‘For what purpose did mom criticize the child who *t* didn't help with the housework?’  安琪：妈妈 批评 了 为了 看 电视 没有 帮忙 做 家务 的 孩子。  Mama piping le weile kan dianshi meiyou bangmang zuo jiawu de haizi  mom criticize PERF in.order.to watch Tv not help do housework REL child  ‘She criticized the child who didn't help with the housework in order to watch TV.’ |
|  | 1. 艾达：菲菲 打 了 为了什么 偷 钱 的 女孩？   Feifei da le weileshenme tou qian de nvhai  Feifei beat PERF for.what steal money REL girl  ‘For what purpose did Feifei beat the girl who *t* stole money?  小晶：她 打 了 为了 整容 而 偷 钱 的 女孩。  ta da le weile zhengrong er tou qian de nvhai  she beat PERF in.order.to cosmetic.surgery so steal money REL girl  ‘She beat the girl who stole money in order to receive cosmetic surgery.’ |
|  | 1. 小达：萧艾 见 了 昨晚 为了什么 没 回家 的 朋友？   Xiaoai jian le zuowan weileshenme mei huijia de pengyou  Xiaoai meet PERF last.night for.what not go.home REL friend  ‘For what purpose did Xiaoai meet the friend who *t* didn't go home last night?’  晓乐：她 见 了 昨晚 为了 加班 赶 报表 没 回家 的 朋友。  ta jian le zuowan weile jiaban gan baobiao mei huijia de pengyou  she meet PERF last.night in.order.to overtime do report not go.home REL friend  ‘She met the friend who didn't go home in order to work overtime to finish the report.’ |
|  | 1. 晴儿：梓豪 见 了 为了什么 要 喝酒 的 朋友？   Zihao jian le weileshenm yao hejiu de pengyou  Zihao meet PERF for.what want drink REL friend  ‘For what purpose did Zihao meet the friend who *t* want to have a drink?’  永琪：他 见 了 为了 庆祝 生日 所以 要 喝酒 的 朋友。  ta jian le weile qingzhu shengri suoyi yao hejiu de pengyou  he meet PERF in.order.to celebrate birthday so want drink REL friend  ‘He met the friend who wanted to have a drink in order to celebrate his birthday. |
|  | 1. 平平：小金 见 了 为了什么 要 卖 房子 的 人？   Xiaojin jian le weileshenm yao mai fangzi de ren  Xiaojin meet PERF for.what want sell house REL person  ‘For what purpose did Xiaojin meet the person who *t* is selling his house?  安安：他 见 了 为了 还 钱 所以 要 卖掉 房子 的 人。  ta jian le weile huan qian suoyi yao maidiao fangzi de ren  he meet PERF in.order.to return money so want sell house REL person  ‘He met the person who was selling his house in order to return the money.’ |
|  | 1. 子彦：梁秋 联系 了 为了什么 要 搬家 的 女孩？   Liangqiu lianxi le weileshenm yao banjia de nvhai  Liangqiu contact PERF for.what want move REL girl  ‘For what purpose did Liangqiu contact the girl who *t* was going to move?  俊逸：她 联系 了 为了 摆脱 前男友 的 纠缠 所以要 搬家 的 女孩。  ta lianxi le weile baituo qiannanyou de jiuchan suoyi yao banjia de nvhai  she contact PERF in.order.to get.rid.of ex.boyfriend REL tangle so want move REL girl |
|  | 1. 佳佳：英博 骂 了 为了什么 把 门 拆 了 的 女孩？   Yingbo ma le weileshenme ba men chai le de nvhai  Yingbo scold PERF for.what BA door tear.down PERF REL girl  ‘For what purpose did Yingbo scolded the girl who *t* tore down the door?’  康康：他 骂 了 为了 一时 好玩 就 把 门 拆 了 的 女孩。  ta ma le weile yishi haowan jiu ba men chai le de nvhai  he scold PERF in.order.to a.momenr have.fun just BA door tear.down PERF REL girl  ‘He scolded the girl who tore down the door in order to have fun for a moment.’ |

# Fillers for the experiment

| Natural | 子彬：小明 吃 饭 了 吗？  Xiaoming chi fan le ma  Xiaoming eat meal PERF PART  ‘Did Xiaoming eat?’  小周：还 没有。  hai meiyou  still not  ‘Not yet.’  小斌：小李 睡觉 了 吗？  Xiaoli shuijiao le ma  Xiaoli sleep PERF PART  ‘Is Xiaoli asleep?’  梦梦：刚刚 睡 了。  ganggang shui le  just.now sleep PERF  ‘He went to bed just now.’  小城：张明 在 干 什么？  Zhangming zai gan shenme  Zhangming PROG do what  ‘What is Zhangming doing?’  黄英：他 在 吃 饭。  ta zai chi fan  he PROG eat meal  ‘He is having a meal.’  家明：小宋 今天 出 门 了 吗？  Xiaosong jintian chu men le ma  Xiaosong today go.out door PERF PART  ‘Did Xiaosong go out today?’  李玲：没有。  meiyou  no  ‘No, he didn’t.’  小微：小陈 在 哪里 买 的 手机？  Xiaochen zai nali mai de shouji  Xiaochen at where buy REL phone  ‘Where did Xiaochen buy his mobile phone?’  家俊：在 二手 网站上。  zai ershou wangzhanshang  on second-hand website  ‘On a second-hand website.’  晓伟：小水 不 洗澡 吗？  Xiaoshui bu xizao ma  Xiaoshui not shower PART  ‘Is Xiaoshui not going to take a bath?’  俊明：她 已经 洗 过 了。  ta yijing xi guo le  she already wash PERF PERF  ‘She has already taken a bath.’  小祉：小雅 什么时候 买 的 这 个 包包？  Xiaoya shenmeshihou mai de zhe ge baobao  Xiaoya when buy REL this CL bag  ‘When did Xiaoya buy this bag?’  家豪：上 星期。  shang xingqi  last week  ‘Last week.’  小芬：小兰 没有 借 你 钱 吗？  Xiaolan meiyou jie ni qian ma  Xiaolan not lend you money PART  ‘Didn’t Xiaolan lend you money?’  子然：没有。  meiyou  no  ‘No, she didn’t.’  小艺：天气 怎么样？  tianqi zenmeyang  weather how  ‘How is the weather?’  博明：挺 好的。  ting haode  quite good  ‘Quite good.’  小康：这 是 小刘 的 笔 吗？  zhe shi Xiaoliu de bi ma  this is Xiaoliu POSS pen PART  ‘Is this Xiaoliu’s pen?’  小张：不是。  bushi  no  ‘No, it isn’t.’  李毅：小爱 喜欢 蔬菜 吗？  Xiaoai xihuan shucai ma  Xiaoai like vegetables PART  ‘Does Xiaoai like vegetables?’  小莲：喜欢。  xihuan  like  ‘Yes, she does.’  小杜：小李 昨天 没 去 学校 吗？  Xiaoli zuotian mei qu xuexiao ma  Xiaoli yesterday not go school PART  ‘Didn’t Xiaoli go to school yesterday?’  程仪：去 了。  qu le  go PERF  ‘Yes, he did.’  小茹：小丽 收到 什么 礼物 了？  Xiaoli shoudao shenme liwu le  Xiaoli receive what present PERF  ‘What present did Xiaoli receive?’  肖亚：一 本 书。  yi ben shu  one CL book  ‘A book.’  青青：小江 几点 去 学校？  Xiaojiang jidian qu xuexiao  Xiaojiang what.time go school  ‘What time does Xiaojiang go to school?’  小汤：下午 三 点。  xiawu san dian  afternoon three o’clock  ‘At three o’clock in the afternoon.’  小唐：小明 晚饭 吃 了 什么？  Xiaoming wanfan chi le shenme  Xiaoming dinner eat PERF what  ‘What did Xiaoming have for dinner.’  丽丽：他 吃 了 两 碗 炒面。  ta chi le liang wan chaomian  he eat PERF two CL fried.noodles  ‘He had two bowls of fried noodles.’  晓娜：朱丽 养 了 猫 吗？  Zhuli yang le mao ma  Zhuli raise PERF cat PART  ‘Does Zhuli have a cat?’  子雅：养 了 好 多 年 了。  yang le hao duo nian le  raise PERF very many year PERF  ‘Yes, she has had a cat for many years.’  林娜：小英 刚刚 去 超市 买 了 什么？  Xiaoying ganggang qu chaoshi mai le shenme  Xiaoying just.now go supermarket buy PERF what  ‘What did Xiaoying buy in the supermarket just now?’  王辉：买 了 3 箱 雪糕 和 一些 面包。  mai le 3 xiang xuegao he yixie mianbao  buy PERF 3 CL ice-cream and some bread  ‘She bought 3 boxes of ice-cream and some bread.’  子然：王丽 昨晚 又 没 回 家 吗？  Wangli zuowan you mei hui jia ma  Wangli last.night again not return home PART  ‘Did Wangli not return home again last night?’  嘉嘉：是的， 这 个 月 都 不 知道 第几回 了。  shide zhe ge yue dou bu zhidao dijihui le  yes this CL month all not know how.many.time PERF  ‘Yes, I have no idea how many times (she’s done so) this month.’  王宏：小红 今天 遛 狗 了 吗？  Xiaohong jintian liu gou le ma  Xiaohong today walk dog PERF PART  ‘Did Xiaohong walk her dog today?’  赵丽：没有， 她 今天 身体 不 舒服。  meiyou ta jintian shenti bu shufu  no she today body not well  ‘No, she didn’t. She didn’t feel well today.’  陈晓：小田 今 年 过年 回 家 吗？  Xiaotian jin nian guonian hui jia ma  Xiaotina this year new.year return home PART  ‘Is Xiaotian going home this year for the Chinese New Year?’  颖颖：他 说 不 回 了。  ta shuo bu hui le  he say not return PART  ‘He said that he was not going home.’  陈璐：小夏 联系 学校 了 吗？  Xiaoxia lianxi xuexiao le ma  Xiaoxia contact school PERF PART  ‘Has Xiaoxia contacted the school yet?’  子文：还 没有， 学校 明天 才 上班。  hai meiyou xuexiao mingtian cai shangban  still not school tomorrow just work  ‘Not yet, the school doesn’t start until tomorrow.’  李琳：小马 的 车 修 好 了 吗？  Xiaoma de che xiu hao le ma  Xiaoma POSS car repair well PERF PART  ‘Is Xiaoma’s car fixed?’  惠敏：修 好 了， 花 了 好多 钱 呢。  xiu hao le hua le haoduo qian ne  repair well PERF spend PERF much money PART  ‘Yes, it has been fixed. It cost a lot of money.’  敏熙：俊杰 现在 一 周 上 几 天 班 啊？  Junjie xianzai yi zhou shang ji tian ban a  Junjie now one week go how.many day work PART  ‘How many days does Junjie work in a week now?’  乐乐：他 现在 几乎 每天 都 要 上班。  ta xianzai jihu meitian dou yao shangban  he now almost everyday all need work  ‘He has to go to work almost every day now.’  子怡：小纪 今天 去 看 医生 了 吗？  Xiaoji jintian qu kan yisheng le ma  Xiaoji today go see doctor PERF PART  ‘Did Xiaoji go to the doctor today?’  刘安：去 了， 医生 说 问题 不 大，多 注意 休息 就 好。  qu le yisheng shuo wenti bu da duo zhuyi xiuxi jiu hao  go PERF doctor say problem not big more notice rest just fine  ‘Yes, he did. The doctor said that it was not a serious problem, just take  more rest.’ |
| --- | --- |
| Unnatural | 1. 小唐：小明 早上 吃 了 什么？   Xiaoming zaoshang chi le shenme  Xiaoming morning eat PERF what  ‘What did Xiaoming have for breakfast?’  丽茹：他 养 了 三 只 猫。  ta yang le san zhi mao  he raise PERF three CL cat  ‘He raised three cats.’   1. 晓棠：朱丽 喜欢 猫 吗？   Zhuli xihuan mao ma  Zhuli like cat PART  ‘Does Zhuli like cats?’  宋雅：写 完 了。  xie wan le  write finish PERF  ‘(She has) finished writing.’   1. 李娜：小智 刚刚 买 了 什么？   Xiaozhi ganggang mai le shenme  Xiaozhi just.now buy PERF what  ‘What did Xiaozhi buy just now?’  王莹：吃 了 雪糕。  chi le xuegao  eat PERF ice-cream  ‘(He) ate an ice-cream.’   1. 李然：王丽 昨晚 几 点 回 家 的？   Wangli zuowan ji dian hui jia de  Wangli last.night what o’clock return home PERF  ‘What time did Wangli return home last night?’  嘉伟：吃 过了。  chi guole  eat PERF  ‘She has eaten.’   1. 志宏：小红 今天 不 学习 吗？   Xiaohong jintian bu xuexi ma  Xiaohong today not study PART  ‘Is Xiaohong not going to study today?  周丽：牛奶。  niunai  milk  ‘milk.’   1. 李晓：小田 今 年 几 岁 了？   Xiaotian jin nian ji sui le  Xiaotian this year what tear.old PERF  ‘How old is Xiaotian this year?’  颖然：五 百 块钱。  wu bai kuaiqian  five hundred yuan  ‘Five hundred yuan.’   1. 晓璐：小夏 没 喝 可乐 吗？   Xiaoxia mei he kele ma  Xiaoxia not drink Cola PART  ‘Didn’t Xiaoxia drink Cola?’  文燕：柠檬 太 辣 了。  ningmeng tai la le  lemon too spicy PERF  ‘The lemon was too spicy.’   1. 丽琳：小马 的 家务 做 完 了 吗？   Xiaoma de jiawu zuo wan le ma  Xiaoma POSS housework do finish PERF PART  ‘Did Xiaoma finish doing the housework?’  周敏：他的 脚 太 臭 了。  tade jiao tai chou le  his feet too smelly PERF  ‘His feet stink.’   1. 佳熙：俊杰 在 哪里 上班？   Junjie zai nali shangban  Junjie at where work  ‘Where does Junjie work?’  乐颖：每天。  meitian  everyday  ‘Everyday.’   1. 怡然：小吉 今天 去 看 电影 了 吗？   Xiaoji jintian qu kan dianying le ma  Xiaoji today go see movie PERF PART  ‘Did Xiaoji go to the movies today?’  陈安：不好吃。  buhaochi  unappetizing  ‘(It was) unappetizing.’   1. 邓权：小江 考试 合格 了 吗？   Xiaojiang kaoshi hege le ma  Xiaojiang exam pass PERF PART  ‘Did Xiaojiang pass her exam?’  肖金：太 贵 了。  tai gui le  too expensive PERF  ‘(It was) too expensive.’   1. 智恩：小乔 圣诞节 去 哪里 玩 了？   Xiaoqiao shengdanjie qu nali wan le  Xiaoqiao Christmas go where play PERF  ‘Where did Xiaoqiao go for Christmas?’  美林：他 家 着火 了。  ta jia zhaohuo le  his house on.fire PERF  ‘His house was on fire.’   1. 晓溪：小平 暑假 去 哪里 玩？   Xiaoping shujia qu nali wan  Xiaoping summer.holiday go where play  ‘Where will Xiaoping go during summer vacation?’  黄佳：绿色的。  lvsede  green  ‘(It is) green.’   1. 晓诗：小芳 什么时候 买 的 房子？   Xiaofang shenmeshih mai de fangzi  Xiaofang when buy PERF house  ‘When did Xiaofang buy the house?’  李婷：还行。  haixing  fine  ‘(It was) fine.’   1. 唐嫣：小明 不 喜欢 吃 什么？   Xiaoming bu xihuan chi shenme  Xiaoming not like eat what  ‘What does Xiaoming not like to eat?’  小茹：他 交往 过 4 个 女朋友。  ta jiaowang guo 4 ge nvpengyou  he contact PERF 4 CL girlfriend  ‘He has had four girlfriends.’   1. 李棠：朱丽 家里 没 养 狗 吗？   Zhuli jiali mei yang gou ma  Zhuli home not raise dog PART  ‘Doesn’t Zhuli have a dog at home?’  宋名：大部分 人 都 不 喜欢。  dabufen ren dou bu xihuan  most people all not like  ‘Most people don’t like.’   1. 李豪：小娅 刚刚 和 你 说 了 什么？   Xiaoya ganggang he ni shuo le shenme  Xiaoya just.now with you say PERF what  ‘What did Xiaoya tell you just now?’  美莹：她 早上 没有 出门 呀。  ta zaoshang meiyou chumen ya  she morning not go.out PART  ‘She didn’t go out this morning.’   1. 李茂：王琴 昨晚 没 和 你 一起 喝 酒 吗？   Wangqin zuowan mei he ni yiqi he jiu ma  Wangqin last.night not with you together drink alcohol PART  ‘Didn’t Wangqin drink with you last night?’  嘉琳：你们 定 好 了 通知 我们 就 行。  nimen ding hao le tongzhi women jiu xing  you decide finish PERF notice us just fine  ‘Just let us know when you have decided.’   1. 志远：小黄 今天 锻炼 身体 了 吗？   Xiaohuang jintian duanlian shenti le ma  Xiaohuang today exercise body PERF PART  ‘Did Xiaohuang exercise today?’  周染：4 门 课。  4 men ke  4 CL course  ‘4 courses.’   1. 李静：小龚 什么时候 结婚 了？   Xiaogong shenmeshihou jiehun le  Xiaogong when get.married PERF  ‘When did Xiaogong get married?’  何颖：黄河。  huanghe  yellow.river  ‘the Yellow river.’   1. 晓雨：小霖 在 哪里 捡到 这 本 书 的？   Xiaolin zai nali jiandao zhe ben shu de  Xiaolin at where find this CL book PERF  ‘Where did Xiaolin find this book?’  文惠：昨天 下雪 了。  zuotian xiaxue le  yesterday snow PERF  ‘It snowed yesterday.’   1. 琳慧：天气预报 怎么 说 的？   tianqiyubao zenme shuo de  weather.forecast how say PERF  ‘What did the weather forecast say?’  周洁：他的 钱 早 就 花 完 了。  tade qian zao jiu hua wan le  his money early just spend finish PERF  ‘He has already spent all his money.’   1. 佳敏：俊俊 最近 都 没有 找 小燕 吗？   Junjun zuijin dou meiyou zhao Xiaoyan ma  Junjun recent all not find Xiaoyan PART  ‘Has Junjun not contacted Xiaoyan recently?’  梅林：老板 说 他 不 同意 这 个 方案。  laoban shuo ta bu tongyi zhe ge fangan  boss say he not agree this CL proposal  ‘The boss said that he disagree with this proposal.’   1. 怡慧：小珉 什么时候 拿到 的 证书？   Xiaomin shenmeshihou nadao de zhengshu  Xiaomin when get PERF certificate  ‘When did Xiaomin get the certificate?’  陈立：早 就 吃 完 了。  zao jiu chi wan le  early just eat finish PERF  ‘(He has) already finished eating.’ |
